# Supplementary material for: Polynitro-functionalized 4-phenyl-1H-pyrazoles as heat-resistant explosives
Source: Royal Society of Chemistry journal article supplement (doi:10.1039/d3ob00949a), 2023-01-01
Supplement: d3ob00949a1.pdf [file d3ob00949a1.pdf]

## Electronic Supplementary Information

### **Polynitro Functionalized 4-Phenyl-1H-pyrazoles as Heat-Resistant Explosives**

Krishna Pandey,<sup>[a]</sup> Prachi Bhatia,<sup>[a]</sup> Khwaja Mohammad,<sup>[a]</sup> Vikas D. Ghule,<sup>[b]</sup> and Dheeraj Kumar\*<sup>[a]</sup>

<sup>[a]</sup> Energetic Materials Laboratory, Department of Chemistry, Indian Institute of Technology Roorkee, Roorkee-247667, Uttarakhand, India. E-mail: [dheeraj.kumar@cy.iitr.ac.in](mailto:dheeraj.kumar@cy.iitr.ac.in)

<sup>[b]</sup> Department of Chemistry, National Institute of Technology Kurukshetra, Kurukshetra-136119, Haryana, India.

#### **Table of contents:**

|    |                        |    |
|----|------------------------|----|
| 1. | Crystal structure data | 2  |
| 2. | Isodesmic reactions    | 8  |
| 3. | NMR spectra            | 9  |
| 4. | Mass spectra           | 24 |
| 5. | IR spectra             | 27 |
| 6. | DSC                    | 33 |

## 1. Crystal structure data:

**Table 1: Crystal data and structure refinement for compound 6.**

|                                             |                                                               |
|---------------------------------------------|---------------------------------------------------------------|
| Identification code                         | compd 6                                                       |
| Empirical formula                           | C <sub>10</sub> H <sub>5</sub> N <sub>7</sub> O <sub>10</sub> |
| Formula weight                              | 383.21                                                        |
| Temperature/K                               | 299(2)                                                        |
| Crystal system                              | Monoclinic                                                    |
| Space group                                 | P2 <sub>1</sub> /n                                            |
| a/Å                                         | 6.911(2)                                                      |
| b/Å                                         | 20.066(7)                                                     |
| c/Å                                         | 11.124(4)                                                     |
| α/°                                         | 90                                                            |
| β/°                                         | 106.903(15)                                                   |
| γ/°                                         | 90                                                            |
| Volume/Å <sup>3</sup>                       | 1476.0(9)                                                     |
| Z                                           | 4                                                             |
| ρ <sub>calc</sub> /cm <sup>3</sup>          | 1.724                                                         |
| μ/mm <sup>-1</sup>                          | 0.157                                                         |
| F(000)                                      | 776                                                           |
| Crystal size/mm <sup>3</sup>                | 0.23 × 0.20 × 0.18                                            |
| Radiation                                   | MoKα (λ = 0.71073)                                            |
| 2θ range for data collection/°              | 4.06 to 56.622                                                |
| Index ranges                                | -9 ≤ h ≤ 9, -26 ≤ k ≤ 26, -14 ≤ l ≤ 14                        |
| Reflections collected                       | 47494                                                         |
| Independent reflections                     | 3669 [R <sub>int</sub> = 0.0551, R <sub>sigma</sub> = 0.0207] |
| Data/restraints/parameters                  | 3669/0/245                                                    |
| Goodness-of-fit on F <sup>2</sup>           | 0.923                                                         |
| Final R indexes [I ≥ 2σ (I)]                | R <sub>1</sub> = 0.0478, wR <sub>2</sub> = 0.1454             |
| Final R indexes [all data]                  | R <sub>1</sub> = 0.0647, wR <sub>2</sub> = 0.1557             |
| Largest diff. peak/hole / e Å <sup>-3</sup> | 0.42/-0.34                                                    |
| CCDC number                                 | 2178043                                                       |

**Table 2: Fractional Atomic Coordinates (×104) and Equivalent Isotropic Displacement Parameters (Å<sup>2</sup>×103) for compound 6. U<sub>eq</sub> is defined as 1/3 of the trace of the orthogonalised UIJ tensor.**

| <b>Atom</b> | <b>x</b> | <b>y</b>  | <b>z</b>   | <b>U(eq)</b> |
|-------------|----------|-----------|------------|--------------|
| N1          | 3339(2)  | 5432.4(7) | 2435.2(13) | 36.5(3)      |
| N2          | 5124(2)  | 5359.2(7) | 3292.6(14) | 38.4(3)      |

|     |          |            |            |           |
|-----|----------|------------|------------|-----------|
| O2  | 8192(2)  | 5405.1(8)  | 5371.6(17) | 62.3(4)   |
| O1  | 6709(2)  | 6155.4(10) | 6169.4(16) | 65.6(5)   |
| O10 | 460(3)   | 8357.9(8)  | 4127.0(17) | 70.0(5)   |
| N3  | 6758(2)  | 5771.1(8)  | 5338.2(16) | 41.6(4)   |
| N7  | 412(3)   | 8168.6(8)  | 5161.3(17) | 46.3(4)   |
| O5  | 1689(3)  | 5592.4(9)  | 8085.1(16) | 71.5(5)   |
| O9  | -140(3)  | 8508.8(8)  | 5898.1(18) | 69.5(5)   |
| N5  | 1146(3)  | 6165.3(9)  | 7948.1(15) | 47.5(4)   |
| O6  | 380(3)   | 6456.5(10) | 8645.3(17) | 77.5(6)   |
| N6  | -50(3)   | 7562.4(9)  | 7460.2(17) | 52.7(4)   |
| O7  | 1111(3)  | 7817.4(10) | 8376.5(16) | 74.0(5)   |
| O8  | -1885(3) | 7585.9(10) | 7165.9(19) | 76.4(6)   |
| N4  | 128(3)   | 6020.2(10) | 2127.8(17) | 54.7(5)   |
| C4  | 5004(2)  | 5732.7(8)  | 4253.4(16) | 33.2(3)   |
| C5  | 2401(2)  | 6462.5(8)  | 4951.8(15) | 32.2(3)   |
| C3  | 3146(2)  | 6055.5(8)  | 4065.3(15) | 33.0(3)   |
| C6  | 2196(3)  | 6163.9(8)  | 6034.6(15) | 34.3(3)   |
| C10 | 1833(3)  | 7121.3(9)  | 4696.8(16) | 35.7(4)   |
| O3  | -515(3)  | 5823.8(13) | 1076.9(18) | 91.7(7)   |
| C8  | 830(3)   | 7189.0(9)  | 6603.1(16) | 36.9(4)   |
| C2  | 2138(3)  | 5846.2(9)  | 2869.2(16) | 36.8(4)   |
| C9  | 1052(3)  | 7476.3(8)  | 5516.2(16) | 35.9(4)   |
| C7  | 1412(3)  | 6524.8(9)  | 6846.5(15) | 35.9(4)   |
| C1  | 2955(4)  | 5052.4(10) | 1256.5(19) | 52.6(5)   |
| O4  | -840(4)  | 6359.6(19) | 2624(3)    | 160.3(17) |

**Table 3: Table containing bond lengths for selected bonds**

| <b>Atom</b> | <b>Atom</b> | <b>Length/Å</b> |
|-------------|-------------|-----------------|
| N1          | N2          | 1.330(2)        |
| N1          | C1          | 1.473(2)        |
| N3          | C4          | 1.443(2)        |
| N7          | C9          | 1.476(2)        |

|    |    |          |
|----|----|----------|
| N5 | C7 | 1.479(2) |
| N6 | C8 | 1.476(2) |
| N4 | C2 | 1.437(2) |
| C5 | C3 | 1.483(2) |

**Table 4: Table containing selected bond angles**

| <b>Atom</b> | <b>Atom</b> | <b>Atom</b> | <b>Angle/°</b> |
|-------------|-------------|-------------|----------------|
| N2          | N1          | C1          | 118.08(15)     |
| C2          | N1          | C1          | 131.49(17)     |
| N2          | C4          | C3          | 114.24(15)     |
| N2          | C4          | N3          | 118.01(15)     |
| C3          | C4          | N3          | 127.74(15)     |
| C9          | C8          | N6          | 121.50(17)     |
| C7          | C8          | N6          | 120.60(16)     |
| N1          | C2          | N4          | 122.22(16)     |
| C3          | C2          | N4          | 127.88(16)     |
| C10         | C9          | N7          | 116.87(16)     |
| C8          | C9          | N7          | 121.59(15)     |
| C6          | C7          | N5          | 116.86(16)     |
| C8          | C7          | N5          | 121.89(15)     |

**Table 5: Crystal data and structure refinement for compound 14.**

|                                      |                                                                 |
|--------------------------------------|-----------------------------------------------------------------|
| Identification code                  | dk_kp_hncptot_0016_0ma_a                                        |
| Empirical formula                    | C <sub>13</sub> H <sub>15</sub> N <sub>15</sub> O <sub>13</sub> |
| Formula weight                       | 589.36                                                          |
| Temperature/K                        | 150.0                                                           |
| Crystal system                       | monoclinic                                                      |
| Space group                          | P2 <sub>1</sub> /c                                              |
| a/Å                                  | 13.2502(4)                                                      |
| b/Å                                  | 22.4477(7)                                                      |
| c/Å                                  | 7.5544(2)                                                       |
| α/°                                  | 90                                                              |
| β/°                                  | 96.143(1)                                                       |
| γ/°                                  | 90                                                              |
| Volume/Å <sup>3</sup>                | 2234.05(11)                                                     |
| Z                                    | 4                                                               |
| ρ <sub>calc</sub> /g/cm <sup>3</sup> | 1.7521                                                          |
| μ/mm <sup>-1</sup>                   | 0.155                                                           |
| F(000)                               | 1208.8                                                          |
| Crystal size/mm <sup>3</sup>         | 0.08 × 0.03 × 0.02                                              |
| Radiation                            | Mo Kα (λ = 0.71073)                                             |
| 2θ range for data collection/°       | 3.58 to 41.54                                                   |

|                                             |                                                               |
|---------------------------------------------|---------------------------------------------------------------|
| Index ranges                                | -13 ≤ h ≤ 13, -22 ≤ k ≤ 22, -7 ≤ l ≤ 7                        |
| Reflections collected                       | 126143                                                        |
| Independent reflections                     | 2321 [R <sub>int</sub> = 0.0732, R <sub>sigma</sub> = 0.0167] |
| Data/restraints/parameters                  | 2321/3/382                                                    |
| Goodness-of-fit on F <sup>2</sup>           | 1.106                                                         |
| Final R indexes [I ≥ 2σ (I)]                | R <sub>1</sub> = 0.0361, wR <sub>2</sub> = 0.0892             |
| Final R indexes [all data]                  | R <sub>1</sub> = 0.0382, wR <sub>2</sub> = 0.0913             |
| Largest diff. peak/hole / e Å <sup>-3</sup> | 0.38/-0.25                                                    |
| CCDC Number                                 | 2270163                                                       |

**Table 6: Fractional Atomic Coordinates (×10<sup>4</sup>) and Equivalent Isotropic Displacement Parameters (Å<sup>2</sup>×10<sup>3</sup>) for Compound 14. U<sub>eq</sub> is defined as 1/3 of the trace of the orthogonalised U<sub>ij</sub> tensor.**

| Atom | x          | y          | z        | U(eq)   |
|------|------------|------------|----------|---------|
| O7   | 1717.7(13) | 4697.6(8)  | 6150(2)  | 23.5(5) |
| O3   | 5629.7(15) | 4683.9(9)  | 6225(3)  | 32.1(5) |
| O8   | 1664.8(16) | 5625.1(9)  | 8407(3)  | 40.1(6) |
| O9   | 2453.5(15) | 5511.1(9)  | 11013(3) | 35.7(5) |
| O10  | 5185.5(15) | 4204.4(9)  | 12114(3) | 37.5(6) |
| O11  | 5843.2(15) | 3747.8(10) | 10006(3) | 39.5(6) |
| O4   | 6887.5(15) | 4277(1)    | 5037(3)  | 39.6(6) |
| O1   | 3515.0(16) | 2786.5(9)  | 8477(3)  | 38.6(6) |
| C5   | 4119.7(19) | 3979.3(11) | 7612(3)  | 20.2(7) |
| C4   | 4795(2)    | 2933.4(12) | 6770(3)  | 24.3(7) |
| C2   | 5642(2)    | 3680.6(12) | 5954(3)  | 23.2(7) |
| C12  | -131.2(19) | 6304.0(12) | 3228(4)  | 20.9(7) |
| C9   | 3681.7(19) | 4664.9(11) | 9903(4)  | 21.3(7) |
| C1   | 6909(2)    | 3045.8(15) | 4410(5)  | 44.9(9) |
| O13  | 836.7(16)  | 7173.8(9)  | 7591(3)  | 37.7(6) |
| O12  | 1591.0(18) | 6804.8(9)  | 11010(3) | 44.8(6) |
| O6   | 2935.7(17) | 4164.4(9)  | 3553(3)  | 41.1(6) |
| N10  | -45.0(16)  | 5816.3(9)  | 2205(3)  | 20.5(6) |
| N8   | 824.1(16)  | 5709(1)    | 4695(3)  | 24.9(6) |
| O2   | 4149.6(17) | 2009(1)    | 7305(3)  | 46.6(6) |
| N12  | -819.6(16) | 6658.9(10) | 2257(3)  | 24.3(6) |
| N6   | 2282.1(17) | 5359.3(10) | 9441(3)  | 25.6(6) |
| N11  | -692.8(16) | 5825.3(10) | 609(3)   | 23.6(6) |
| N5   | 2916.2(16) | 3877.1(11) | 4905(3)  | 23.2(6) |
| O5   | 2582.0(17) | 3370.6(10) | 4919(3)  | 44.7(6) |
| N7   | 5169.0(17) | 4047.6(10) | 10556(3) | 25.9(6) |
| N9   | 388.6(17)  | 6276.9(10) | 4789(3)  | 25.4(6) |
| N14  | 766.6(17)  | 4871.1(10) | 2761(3)  | 27.7(6) |
| N3   | 4101.1(19) | 2546.7(11) | 7557(3)  | 29.9(6) |

|     |             |            |         |         |
|-----|-------------|------------|---------|---------|
| N4  | 6085.3(18)  | 4252.7(11) | 5707(3) | 27.8(6) |
| N1  | 6052.5(17)  | 3158.7(11) | 5441(3) | 29.7(6) |
| N15 | -1828.7(17) | 6589.3(10) | -487(3) | 30.3(6) |
| N13 | -1162(2)    | 7229.3(11) | 2608(3) | 32.6(7) |
| N2  | 5520.2(18)  | 2692.9(10) | 5931(3) | 32.0(6) |
| C11 | 541.2(19)   | 5419.3(12) | 3179(4) | 21.2(7) |
| C6  | 3239.5(19)  | 4159.7(11) | 6628(3) | 19.5(7) |
| C13 | -1138(2)    | 6349.1(12) | 717(4)  | 22.3(7) |
| C8  | 2849.0(19)  | 4864.1(11) | 8808(3) | 20.5(7) |
| C10 | 4307.0(19)  | 4232.5(11) | 9327(3) | 19.9(7) |
| C7  | 2528(2)     | 4597.9(11) | 7120(3) | 18.9(7) |
| C3  | 4814.8(19)  | 3555.6(12) | 6836(3) | 20.9(7) |

**Table 7: Table containing bond lengths for selected bonds**

| Atom | Atom | Length/Å | Atom | Atom | Length/Å |
|------|------|----------|------|------|----------|
| O7   | C7   | 1.254(3) | C9   | C10  | 1.377(4) |
| O3   | N4   | 1.227(3) | C1   | N1   | 1.465(4) |
| O8   | N6   | 1.224(3) | O6   | N5   | 1.210(3) |
| O9   | N6   | 1.233(3) | N10  | N11  | 1.403(3) |
| O10  | N7   | 1.227(3) | N10  | C11  | 1.348(3) |
| O11  | N7   | 1.226(3) | N8   | N9   | 1.404(3) |
| O4   | N4   | 1.226(3) | N8   | C11  | 1.335(3) |
| O1   | N3   | 1.221(3) | O2   | N3   | 1.225(3) |
| C5   | C6   | 1.375(4) | N12  | N13  | 1.393(3) |
| C5   | C10  | 1.412(4) | N12  | C13  | 1.382(3) |
| C5   | C3   | 1.488(4) | N6   | C8   | 1.451(3) |
| C4   | N3   | 1.438(4) | N11  | C13  | 1.322(3) |
| C4   | N2   | 1.322(4) | N5   | O5   | 1.221(3) |
| C4   | C3   | 1.398(4) | N5   | C6   | 1.470(3) |
| C2   | N4   | 1.433(4) | N7   | C10  | 1.453(3) |
| C2   | N1   | 1.365(3) | N14  | C11  | 1.313(3) |
| C2   | C3   | 1.372(4) | N1   | N2   | 1.335(3) |
| C12  | N10  | 1.351(3) | N15  | C13  | 1.333(3) |
| C12  | N12  | 1.364(3) | C6   | C7   | 1.439(4) |
| C12  | N9   | 1.302(3) | C8   | C7   | 1.431(4) |
| C9   | C8   | 1.380(4) |      |      |          |

**Table 8: Table containing selected bond angles**

| <b>Atom</b> | <b>Atom</b> | <b>Atom</b> | <b>Angle/°</b> | <b>Atom</b> | <b>Atom</b> | <b>Atom</b> | <b>Angle/°</b> |
|-------------|-------------|-------------|----------------|-------------|-------------|-------------|----------------|
| C10         | C5          | C6          | 115.7(2)       | C4          | N3          | O1          | 116.3(2)       |
| C3          | C5          | C6          | 120.0(2)       | O2          | N3          | O1          | 124.7(2)       |
| C3          | C5          | C10         | 124.3(2)       | O2          | N3          | C4          | 119.0(2)       |
| N2          | C4          | N3          | 118.8(3)       | O4          | N4          | O3          | 125.1(2)       |
| C3          | C4          | N3          | 126.8(3)       | C2          | N4          | O3          | 116.3(2)       |
| C3          | C4          | N2          | 114.4(2)       | C2          | N4          | O4          | 118.6(2)       |
| N1          | C2          | N4          | 123.4(2)       | C1          | N1          | C2          | 130.8(3)       |
| C3          | C2          | N4          | 127.4(2)       | N2          | N1          | C2          | 110.8(2)       |
| C3          | C2          | N1          | 109.0(2)       | N2          | N1          | C1          | 118.3(2)       |
| N12         | C12         | N10         | 105.0(2)       | N1          | N2          | C4          | 104.2(2)       |
| N9          | C12         | N10         | 114.3(2)       | N8          | C11         | N10         | 103.8(2)       |
| N9          | C12         | N12         | 140.6(3)       | N14         | C11         | N10         | 128.4(2)       |
| C10         | C9          | C8          | 120.6(2)       | N14         | C11         | N8          | 127.8(2)       |
| N11         | N10         | C12         | 113.4(2)       | N5          | C6          | C5          | 120.1(2)       |
| C11         | N10         | C12         | 107.6(2)       | C7          | C6          | C5          | 127.1(2)       |
| C11         | N10         | N11         | 137.9(2)       | C7          | C6          | N5          | 112.8(2)       |
| C11         | N8          | N9          | 114.0(2)       | N11         | C13         | N12         | 113.7(2)       |
| N13         | N12         | C12         | 130.3(2)       | N15         | C13         | N12         | 119.7(2)       |
| C13         | N12         | C12         | 106.5(2)       | N15         | C13         | N11         | 126.6(2)       |
| C13         | N12         | N13         | 123.1(2)       | N6          | C8          | C9          | 117.4(2)       |
| O9          | N6          | O8          | 121.4(2)       | C7          | C8          | C9          | 122.7(2)       |
| C8          | N6          | O8          | 119.8(2)       | C7          | C8          | N6          | 119.9(2)       |
| C8          | N6          | O9          | 118.7(2)       | C9          | C10         | C5          | 121.4(2)       |
| C13         | N11         | N10         | 101.3(2)       | N7          | C10         | C5          | 121.3(2)       |
| O5          | N5          | O6          | 123.0(2)       | N7          | C10         | C9          | 117.3(2)       |
| C6          | N5          | O6          | 119.1(2)       | C6          | C7          | O7          | 121.0(2)       |
| C6          | N5          | O5          | 117.8(2)       | C8          | C7          | O7          | 126.9(2)       |
| O11         | N7          | O10         | 123.0(2)       | C8          | C7          | C6          | 112.1(2)       |
| C10         | N7          | O10         | 117.6(2)       | C4          | C3          | C5          | 130.0(2)       |
| C10         | N7          | O11         | 119.4(2)       | C2          | C3          | C5          | 128.4(2)       |
| N8          | N9          | C12         | 100.2(2)       | C2          | C3          | C4          | 101.6(2)       |

## 2. Isodesmic Reactions:

### Compound 5:

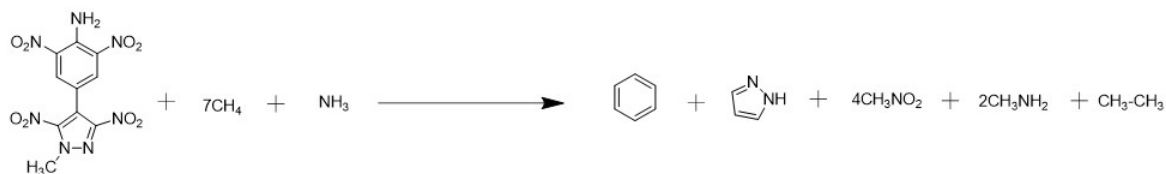

### Compound 6:

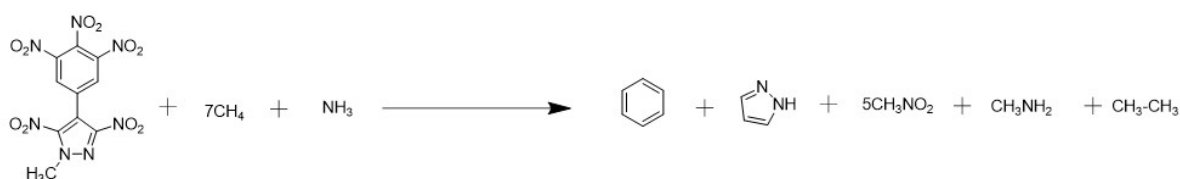

### Compound 7:

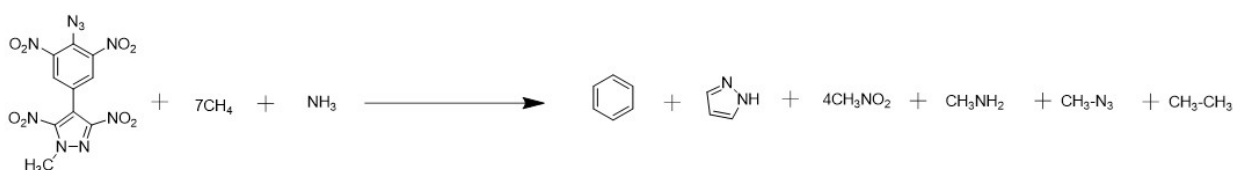

### Compound 8:

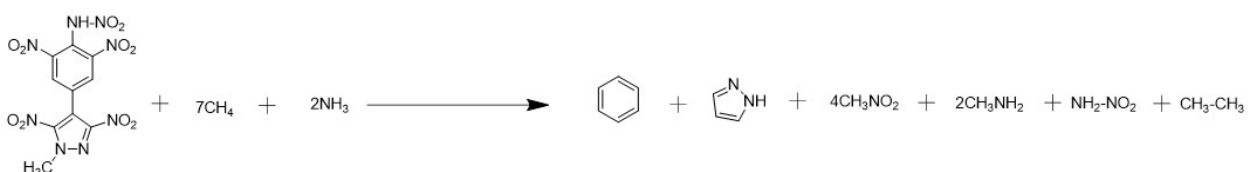

### Compound 10:

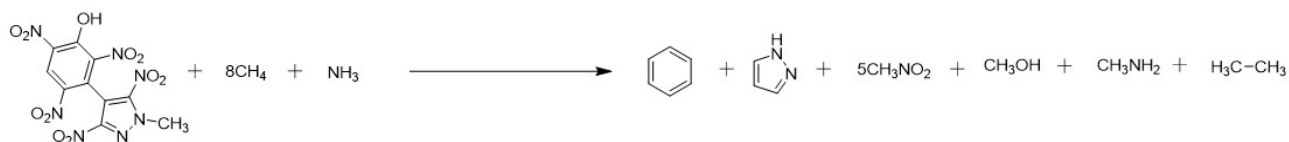

### Energetic Anion for salts 11-14:

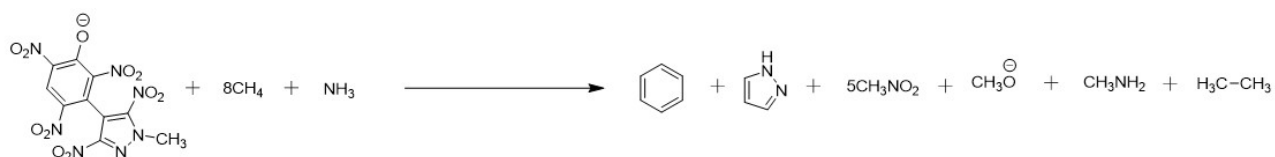



### 3. NMR Spectra:

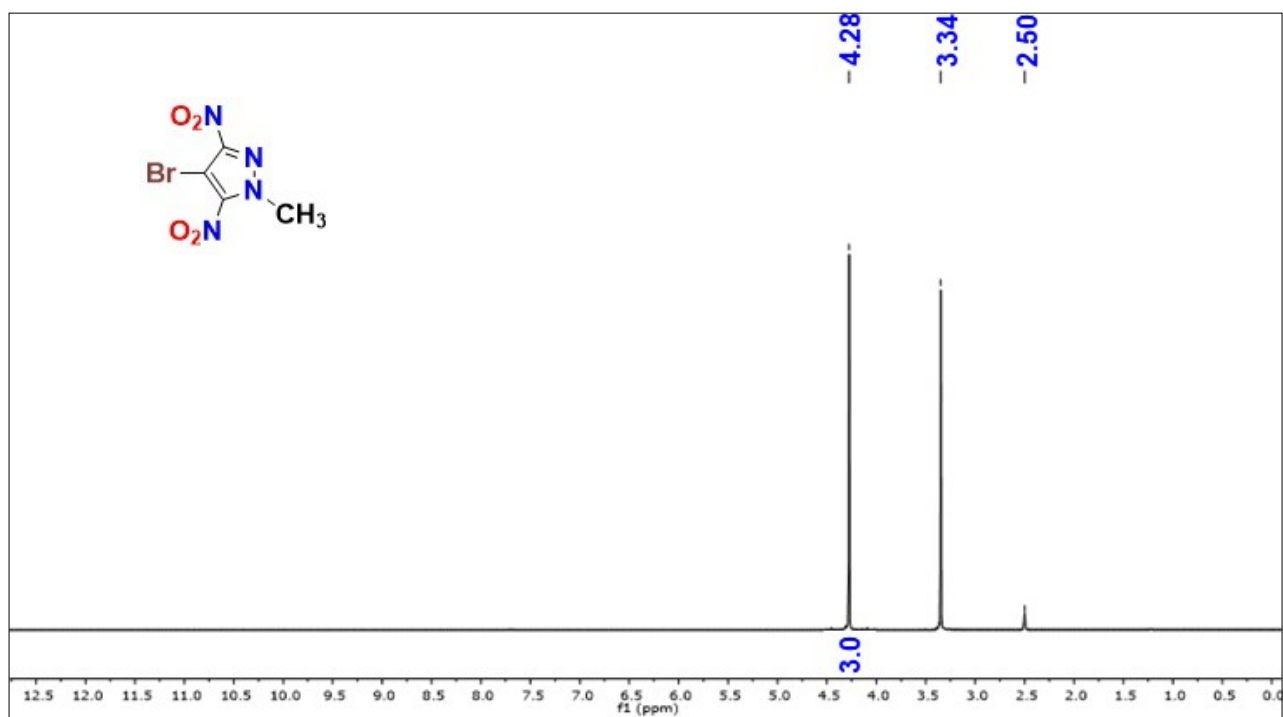

Fig.1:  $^1\text{H}$  NMR Spectra of compound 2

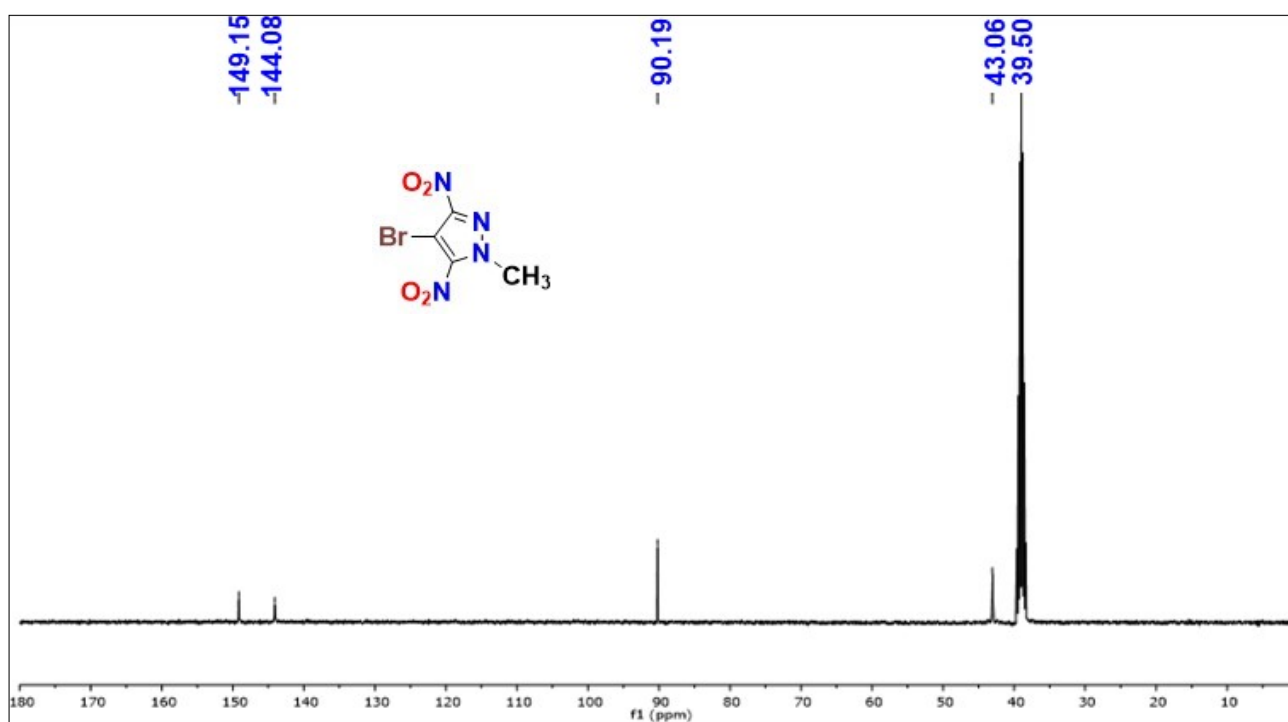

Fig.2:  $^{13}\text{C}\{^1\text{H}\}$  NMR Spectra of compound 2

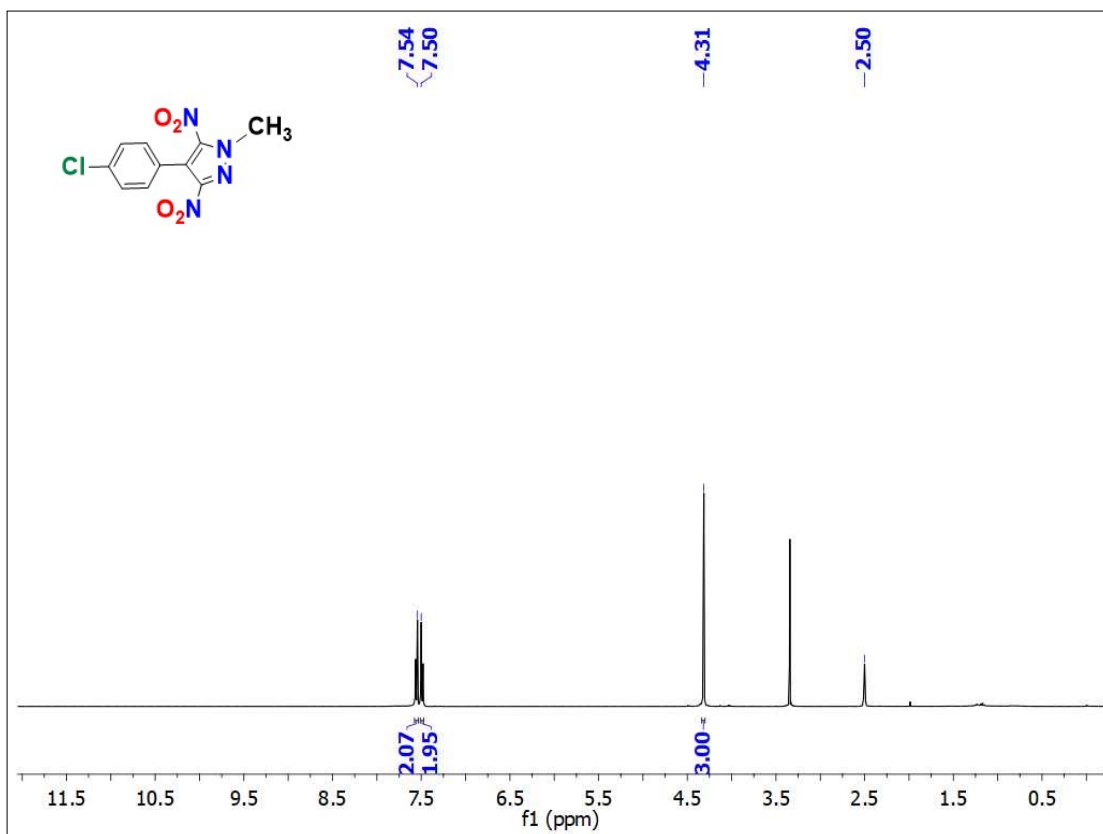

Fig.3:  $^1\text{H}$  NMR Spectra of compound **3**

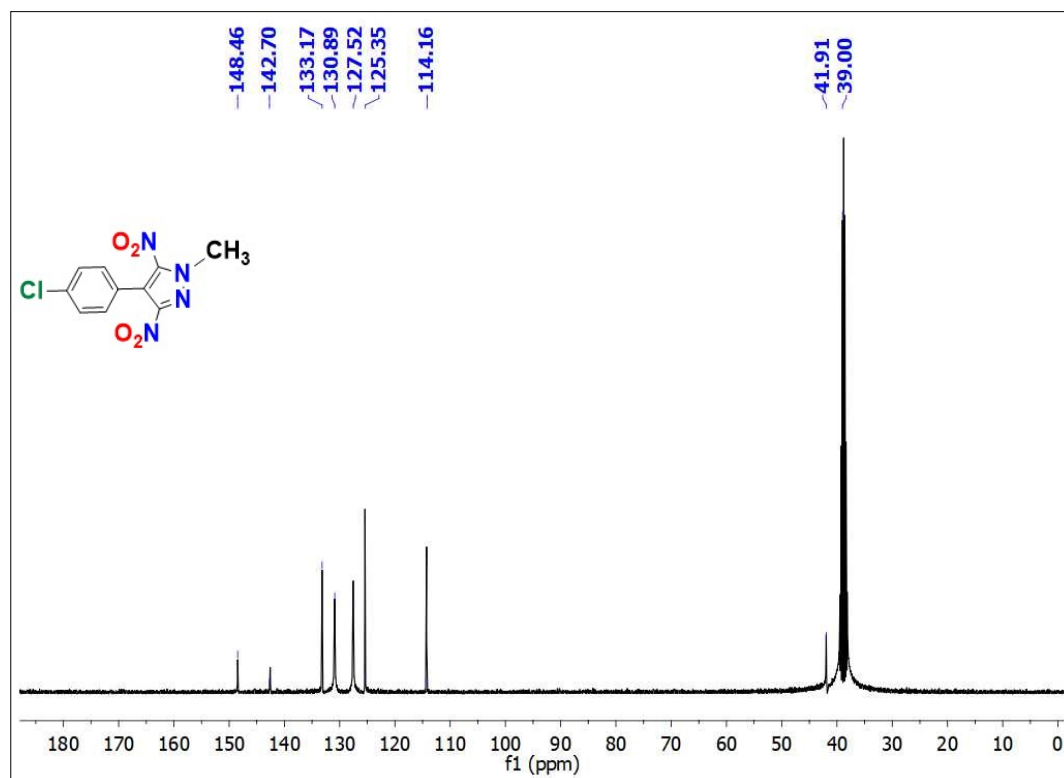

Fig.4:  $^{13}\text{C}\{^1\text{H}\}$  NMR Spectra of compound **3**

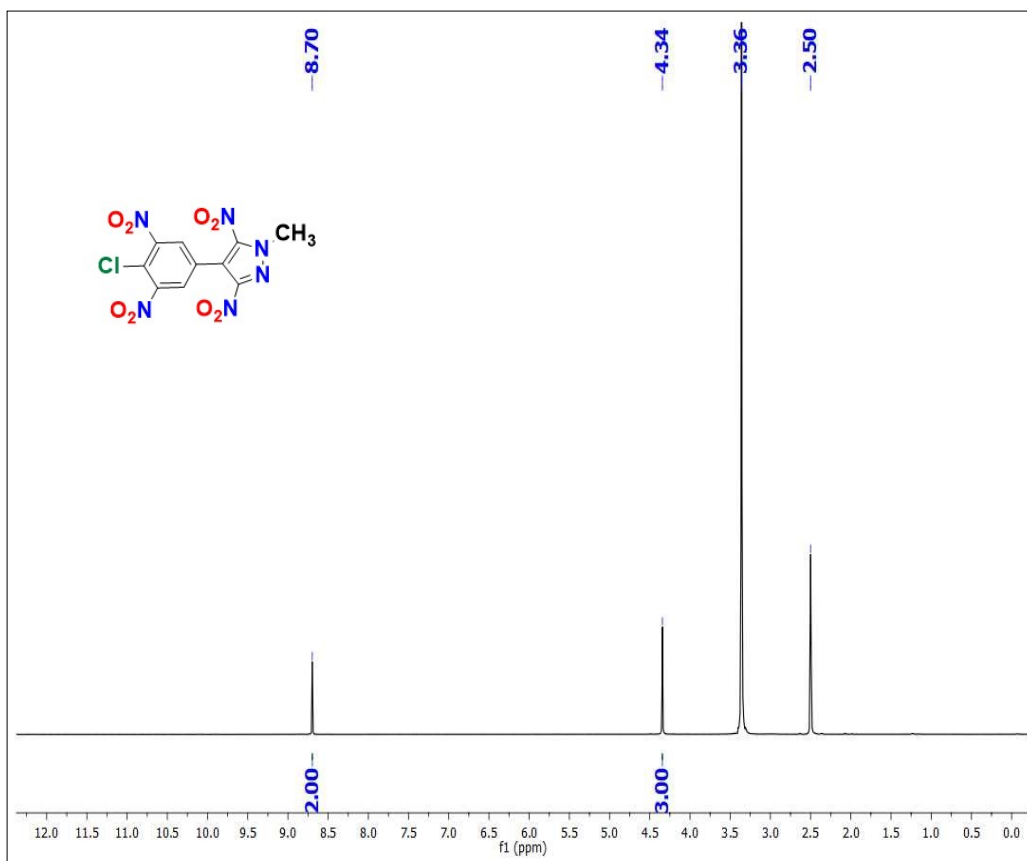

Fig.5:  $^1\text{H}$  NMR Spectra of compound 4

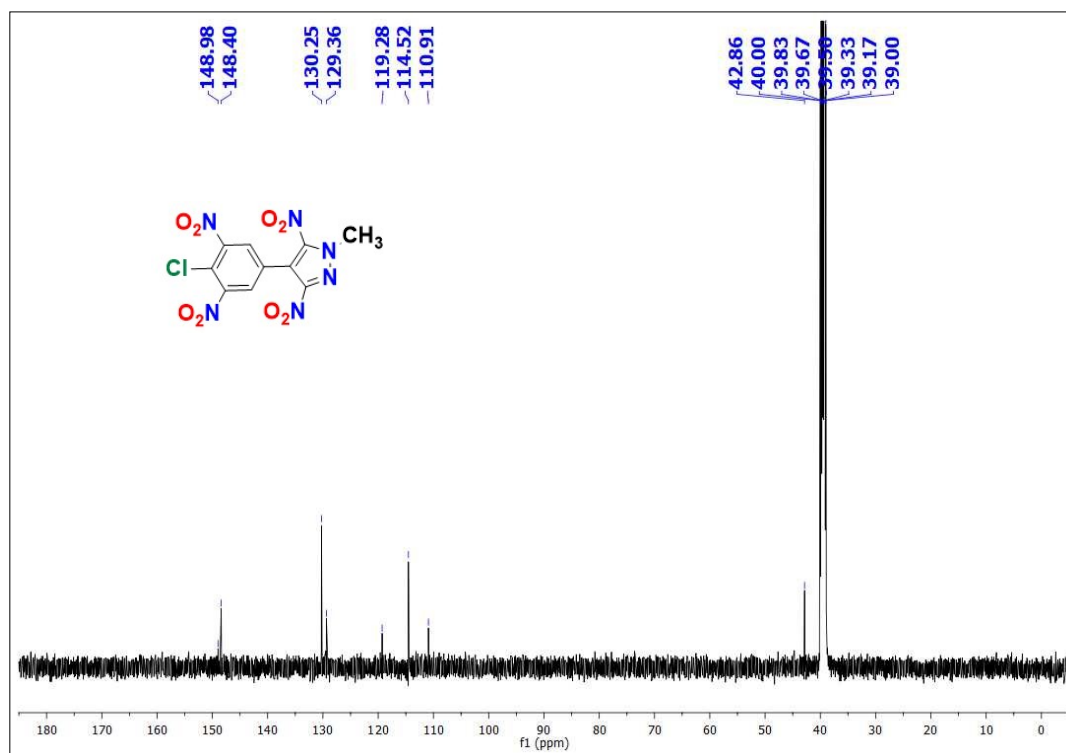

Fig.6:  $^{13}\text{C}\{^1\text{H}\}$  NMR Spectra of compound 4

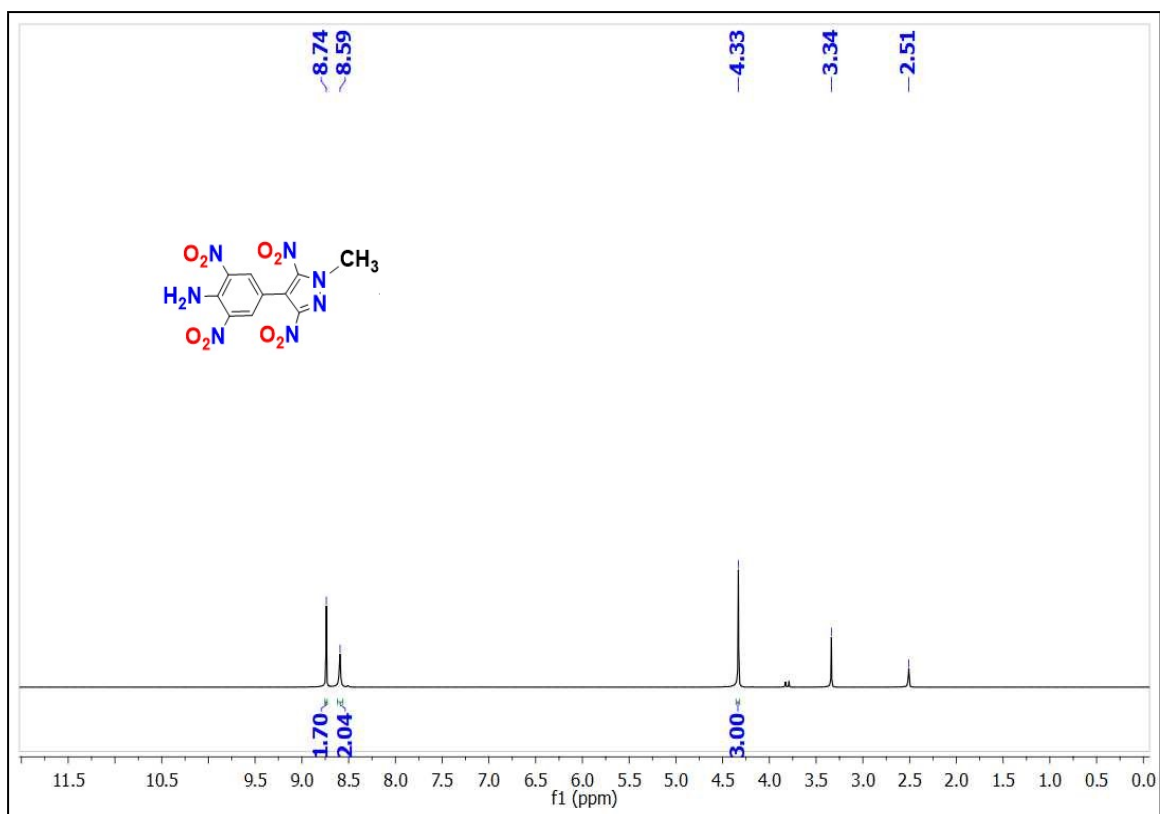

Fig.7:  $^1\text{H}$  NMR Spectra of compound 5

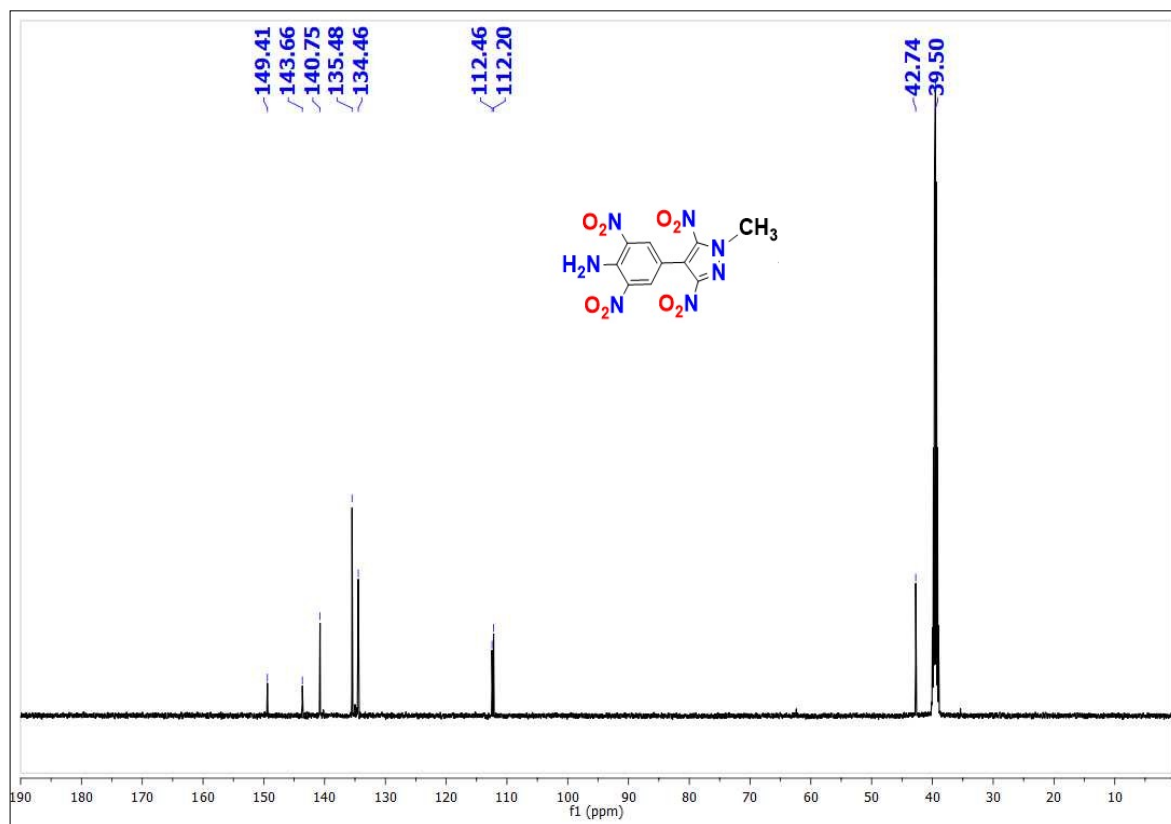

Fig.8:  $^{13}\text{C}\{^1\text{H}\}$  NMR Spectra of compound 5

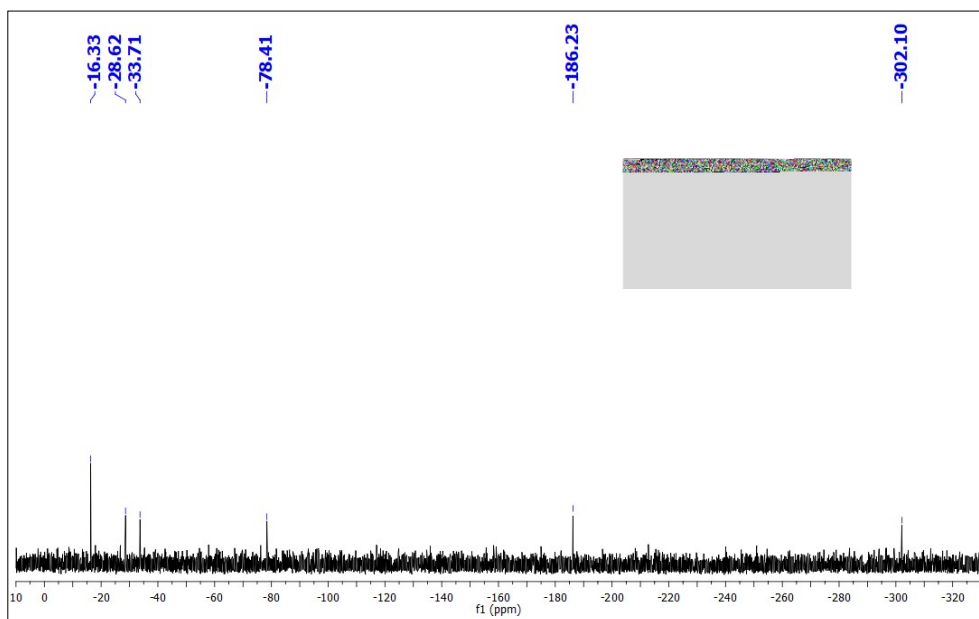

Fig.9:  $^{15}\text{N}$  NMR Spectra of compound **5**

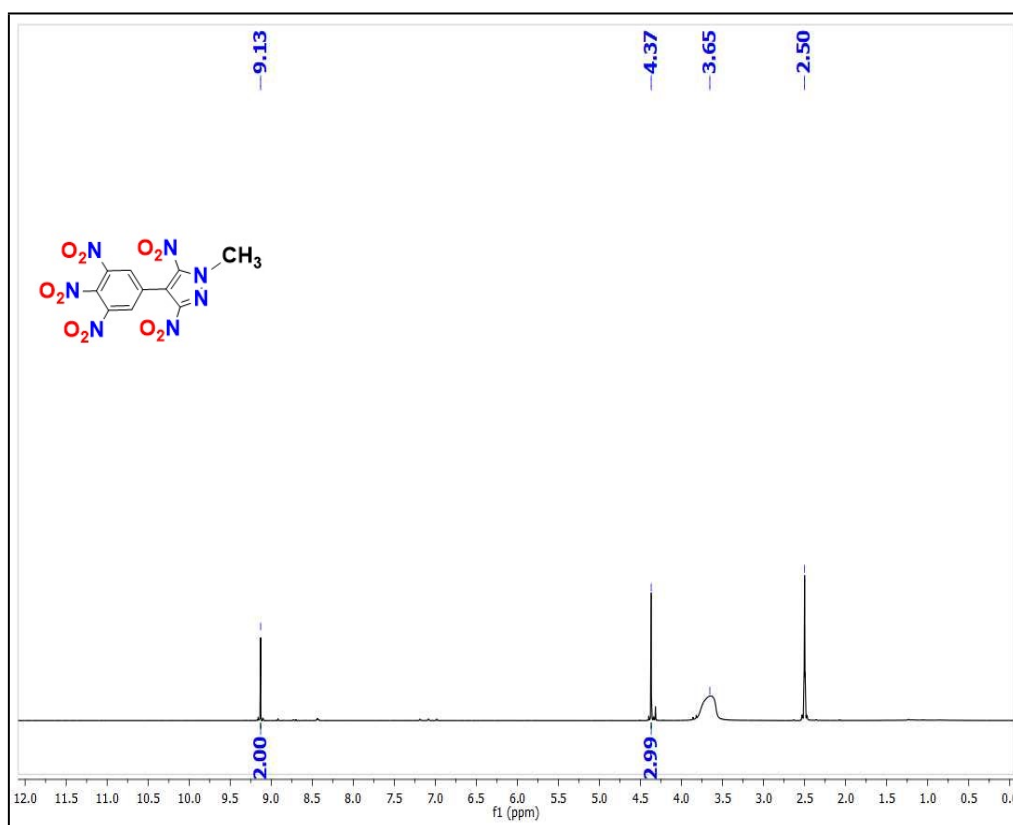

Fig.10:  $^1\text{H}$  NMR Spectra of compound **6**

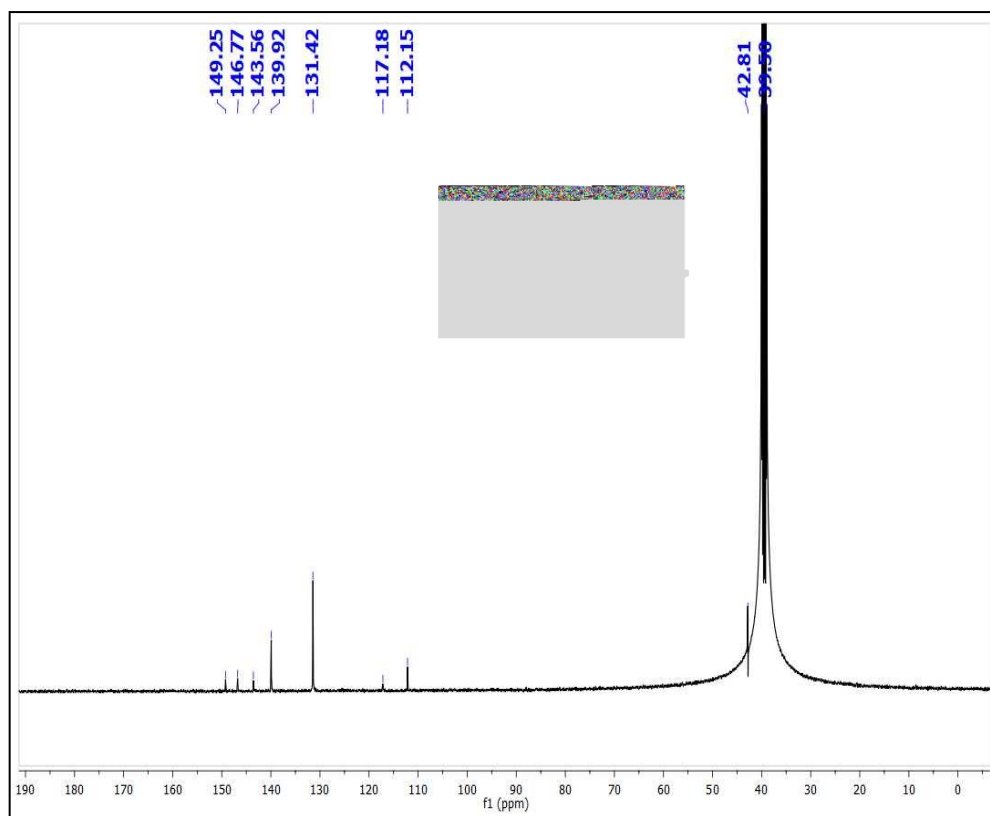

Fig.11:  $^{13}\text{C}\{^1\text{H}\}$  NMR Spectra of compound **6**

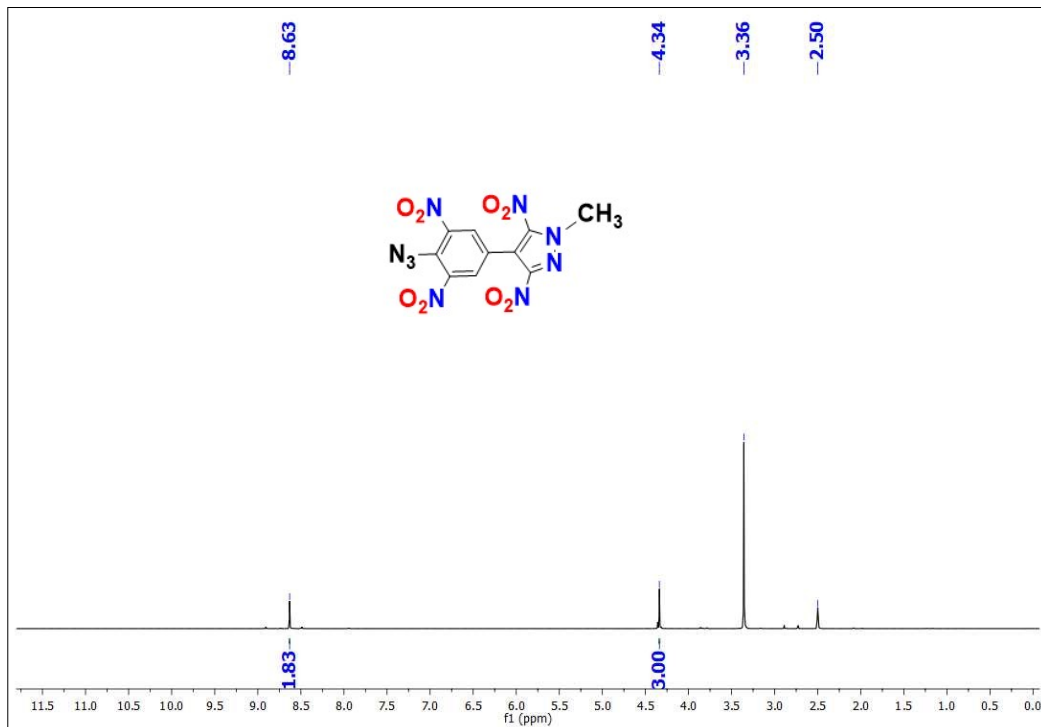

Fig.12:  $^1\text{H}$  NMR Spectra of compound **7**

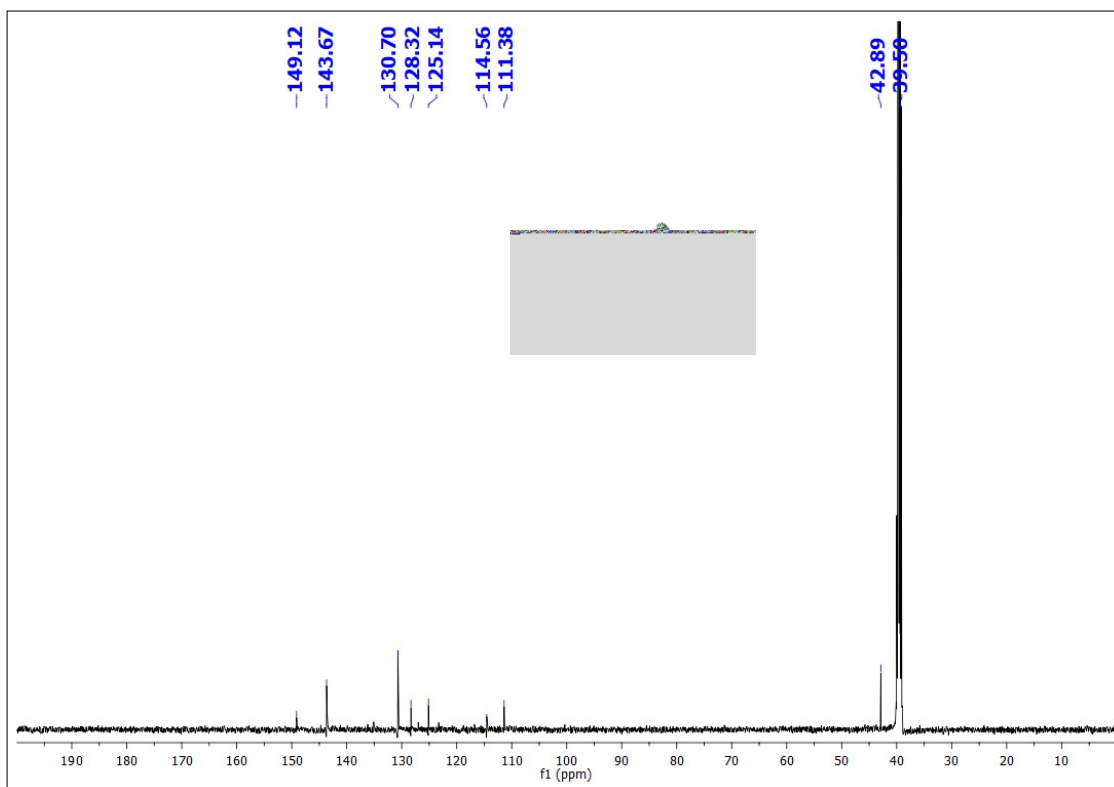

Fig.13:  $^{13}\text{C}\{^1\text{H}\}$  NMR Spectra of compound 7

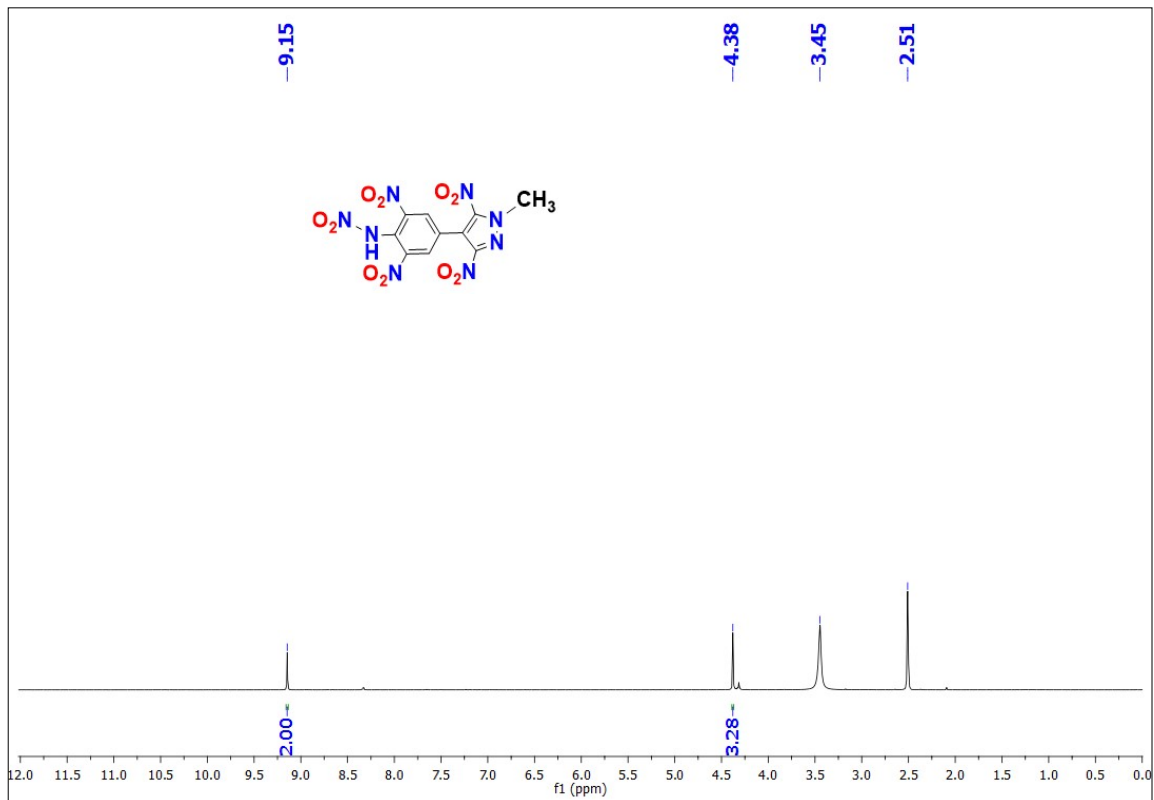

Fig.14:  $^1\text{H}$  NMR Spectra of compound 8

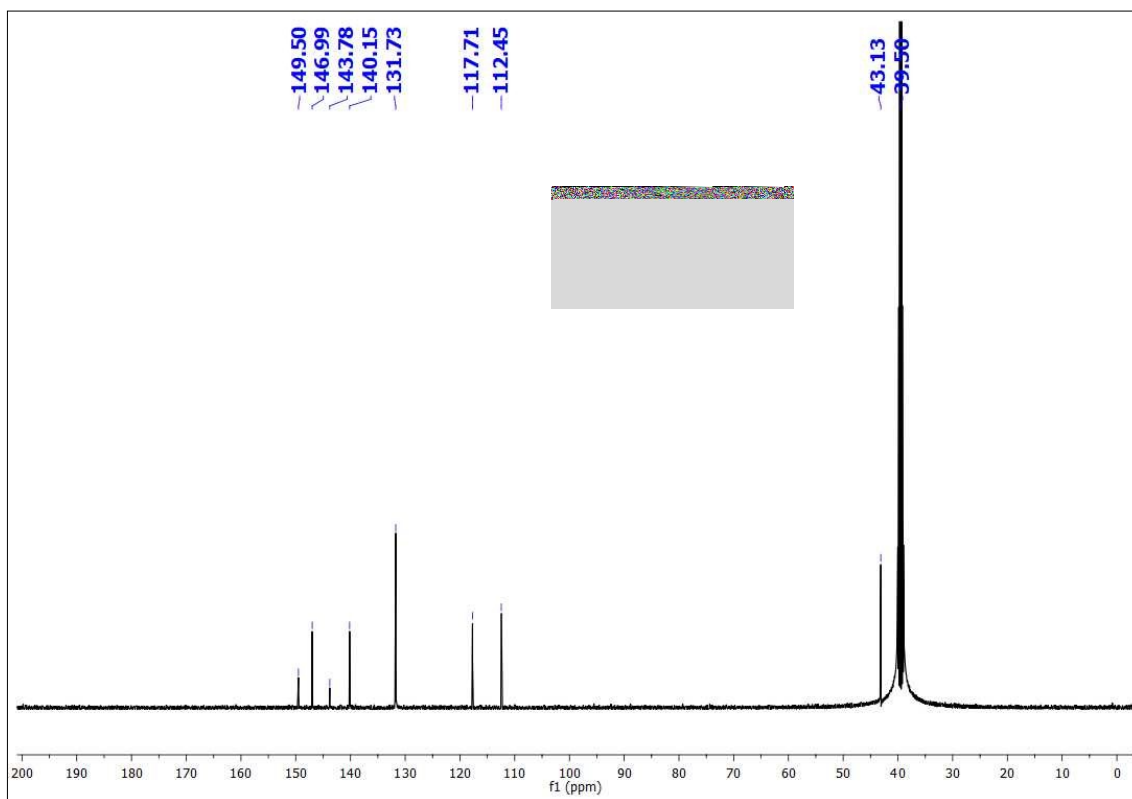

Fig.15:  $^{13}\text{C}\{^1\text{H}\}$  NMR Spectra of compound **8**

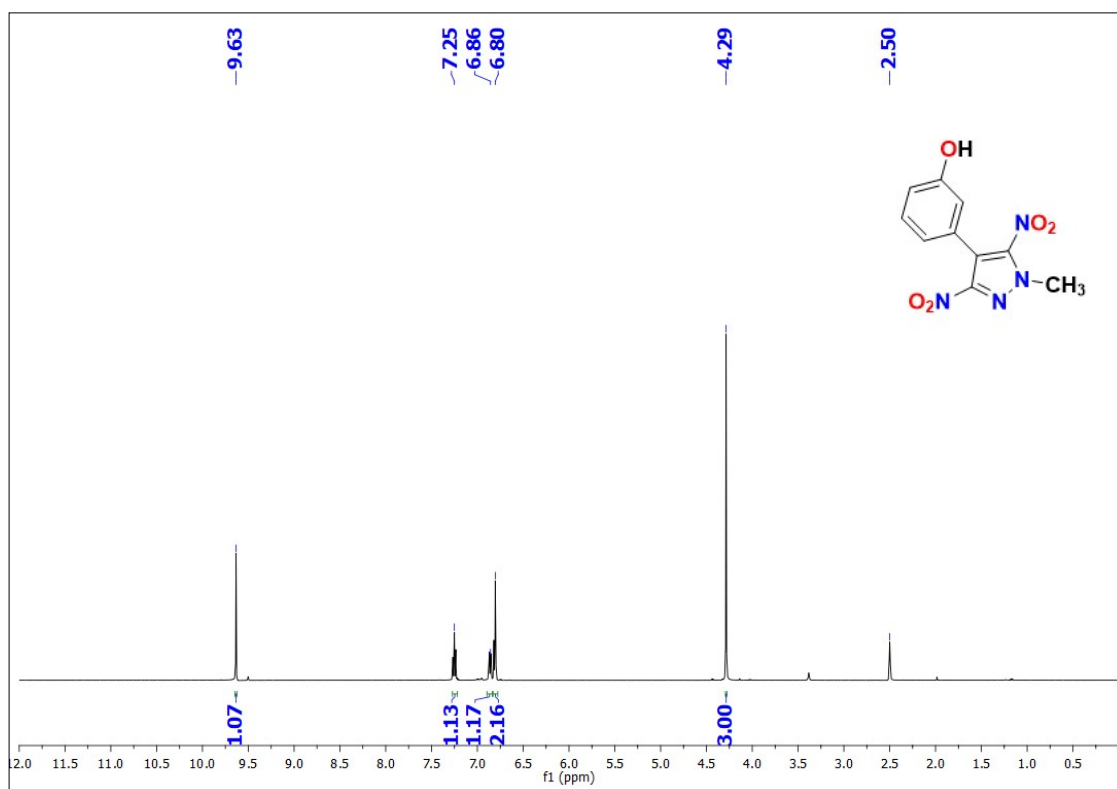

Fig.16:  $^1\text{H}$  NMR Spectra of compound **9**



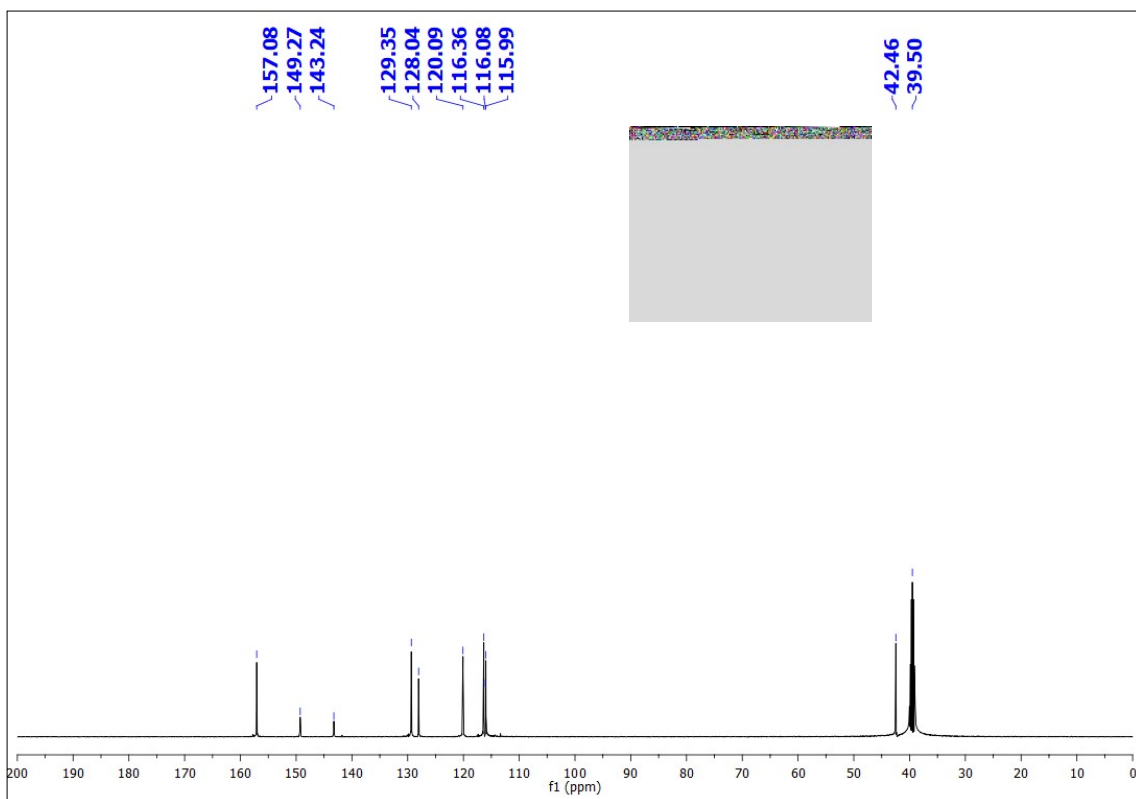

Fig.17:  $^{13}\text{C}\{^1\text{H}\}$  NMR Spectra of compound **9**

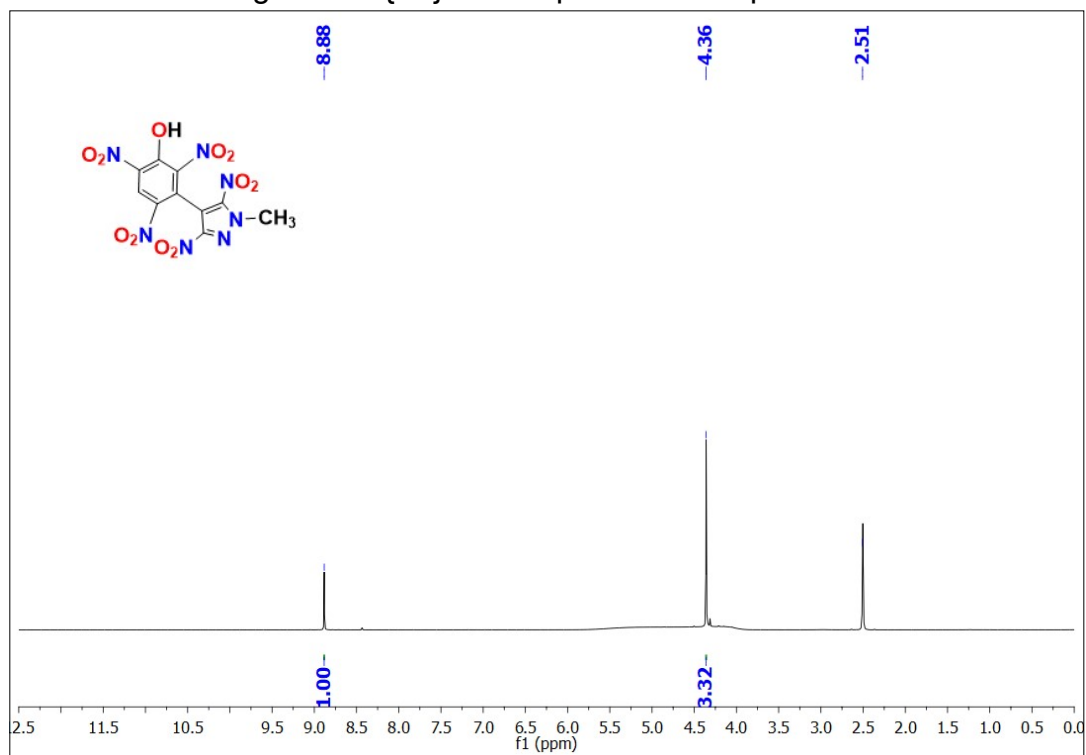

Fig.18:  $^1\text{H}$  NMR Spectra of compound **10**



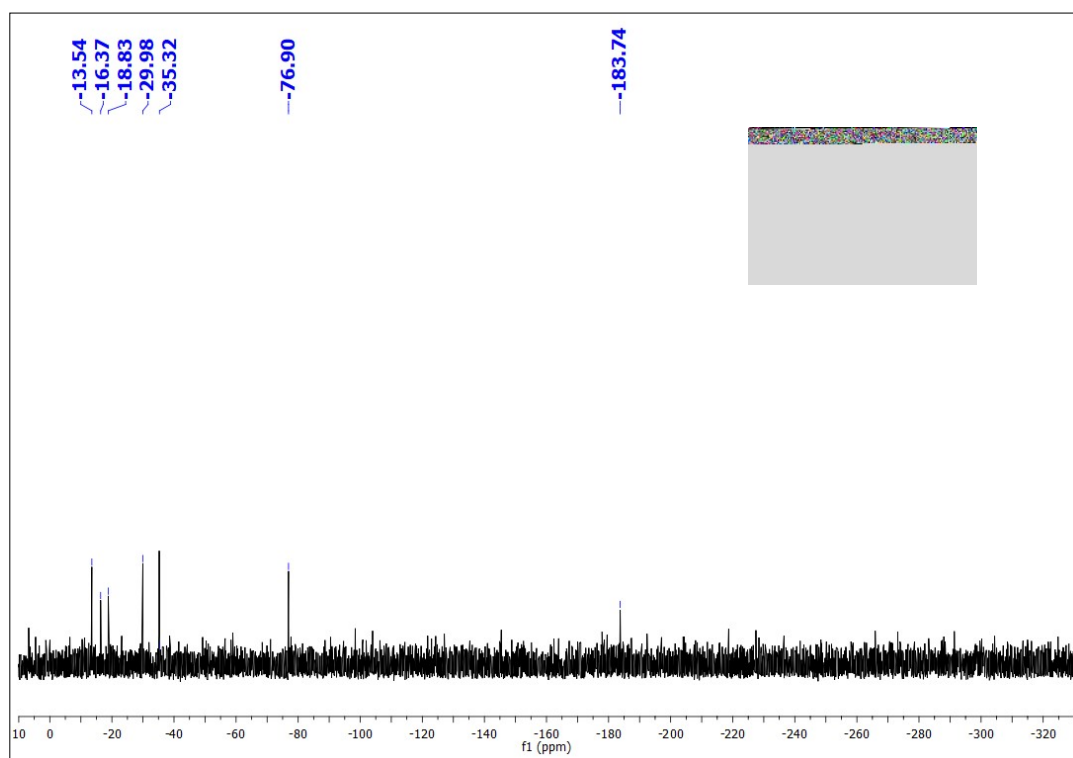

Fig.21:  $^{15}\text{N}$  NMR Spectra of compound **10**

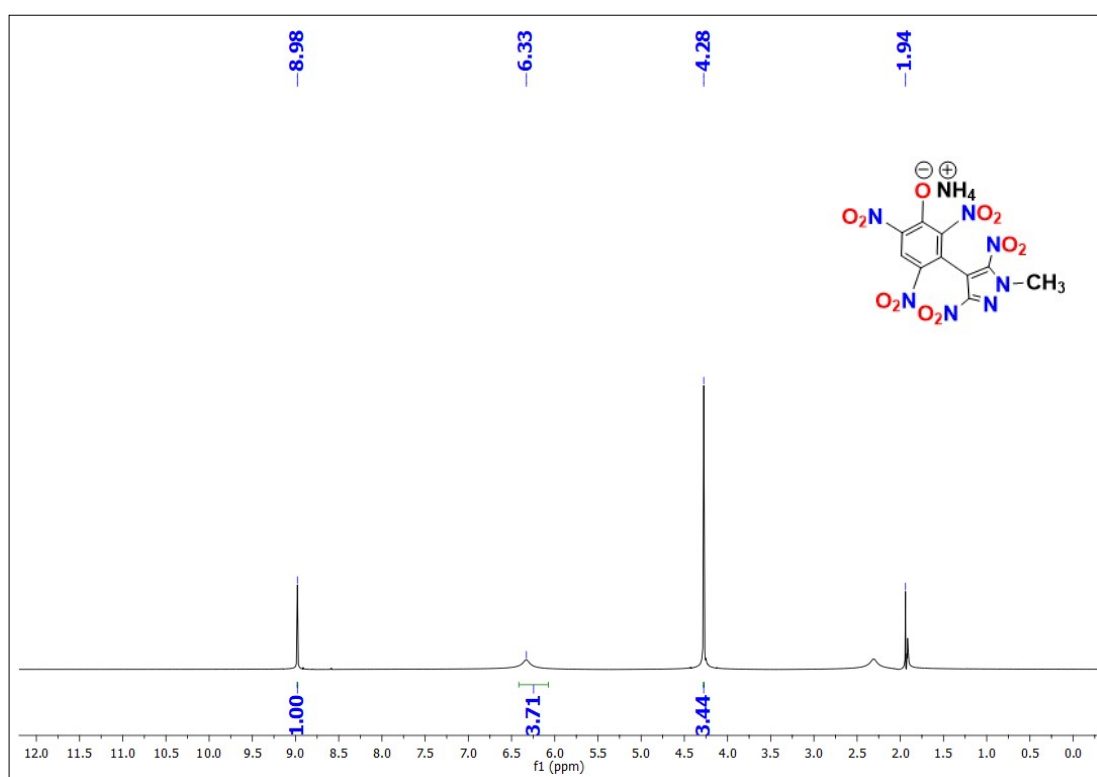

Fig.22:  $^1\text{H}$  NMR Spectra of compound **11**

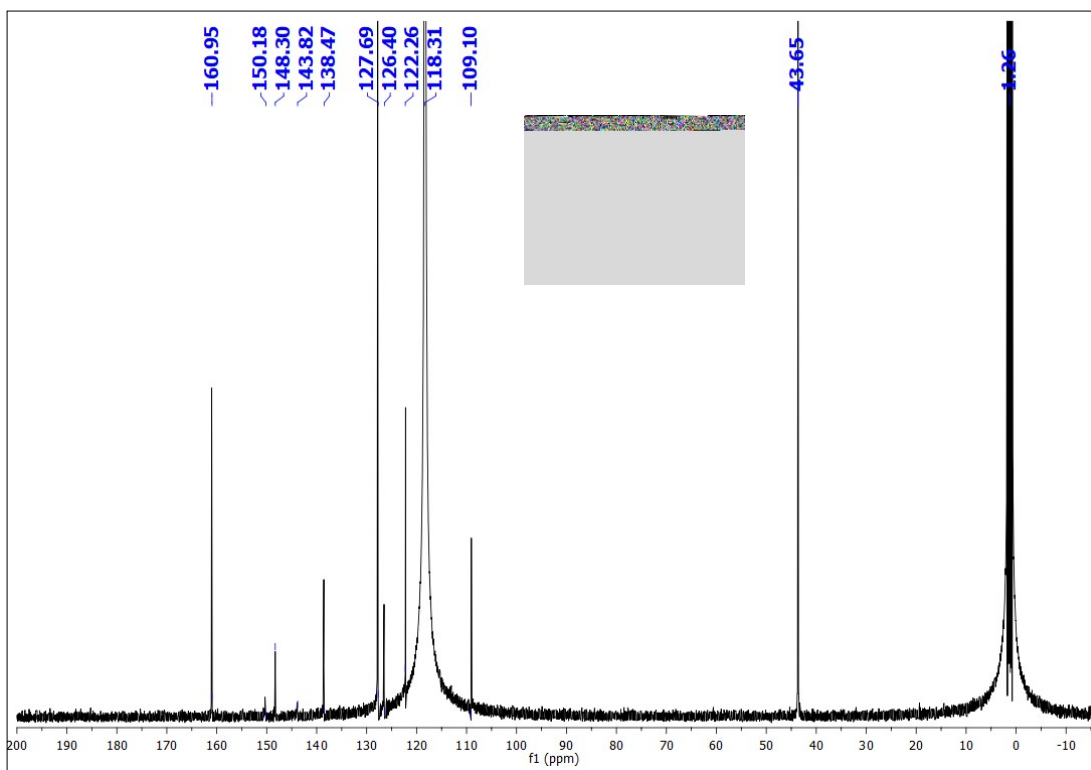

Fig.23:  $^{13}\text{C}\{^1\text{H}\}$  NMR Spectra of compound **11**

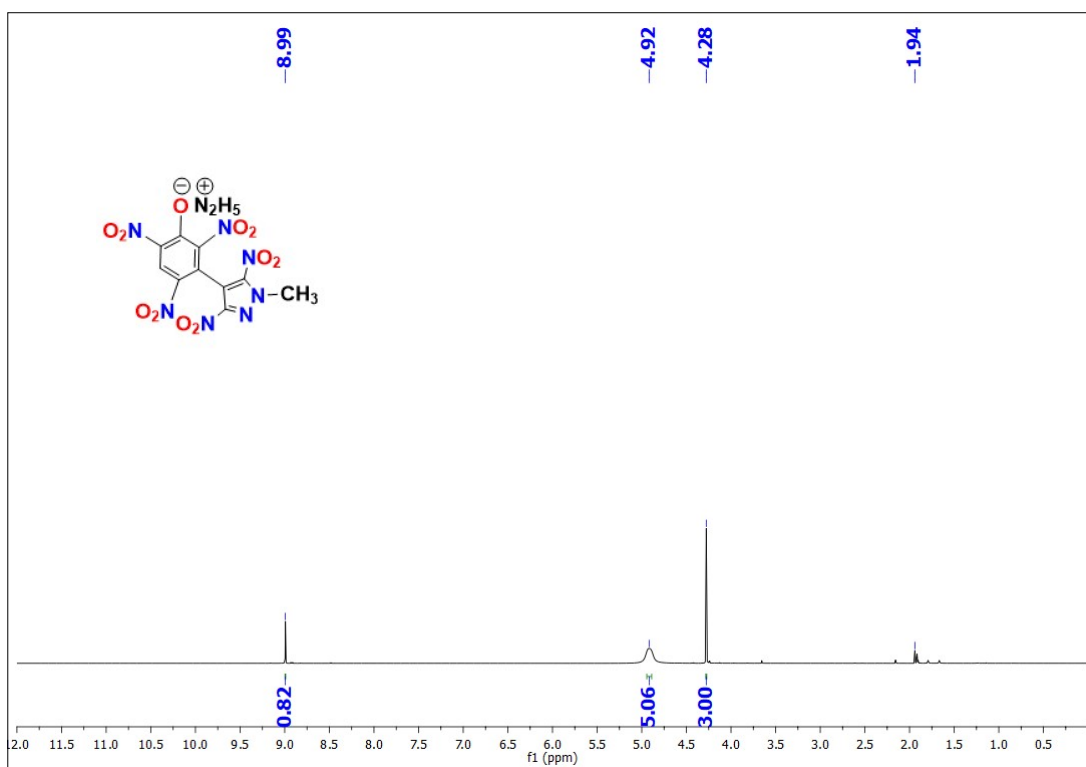

Fig.24:  $^1\text{H}$  NMR Spectra of compound **12**

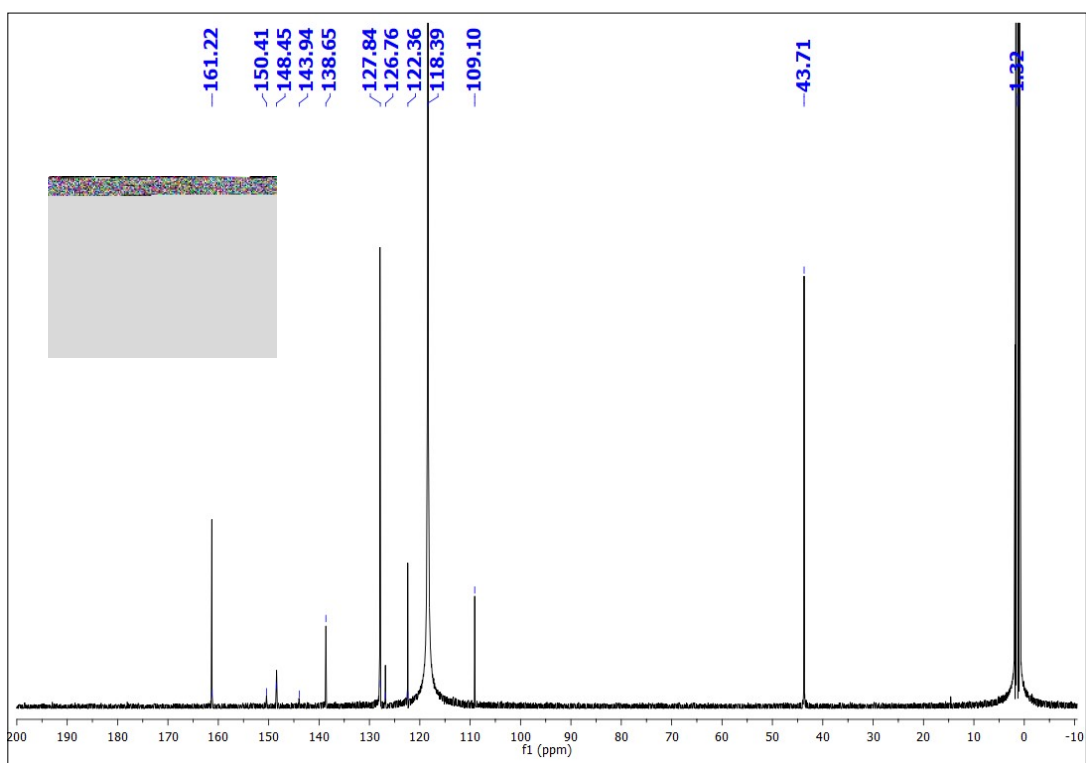

Fig.25:  $^{13}\text{C}\{^1\text{H}\}$  NMR Spectra of compound **12**

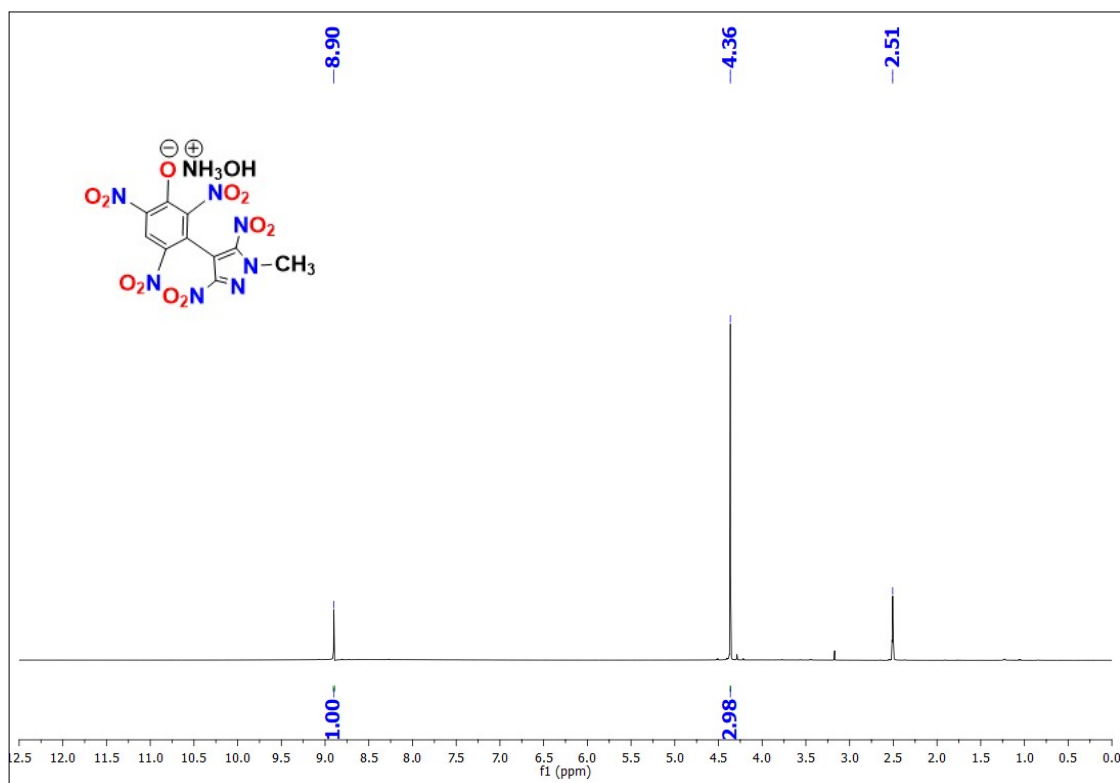

Fig.26:  $^1\text{H}$  NMR Spectra of compound **13**

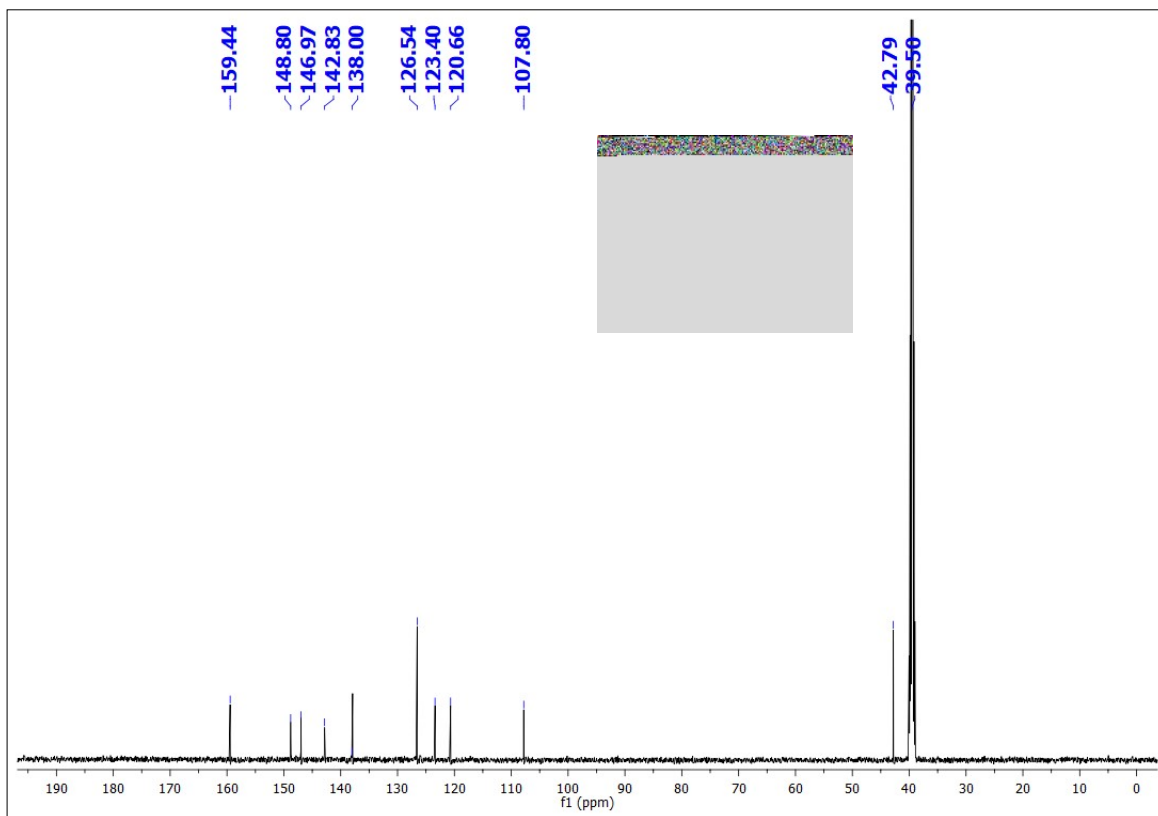

Fig.27:  $^{13}\text{C}\{^1\text{H}\}$  NMR Spectra of compound **13**

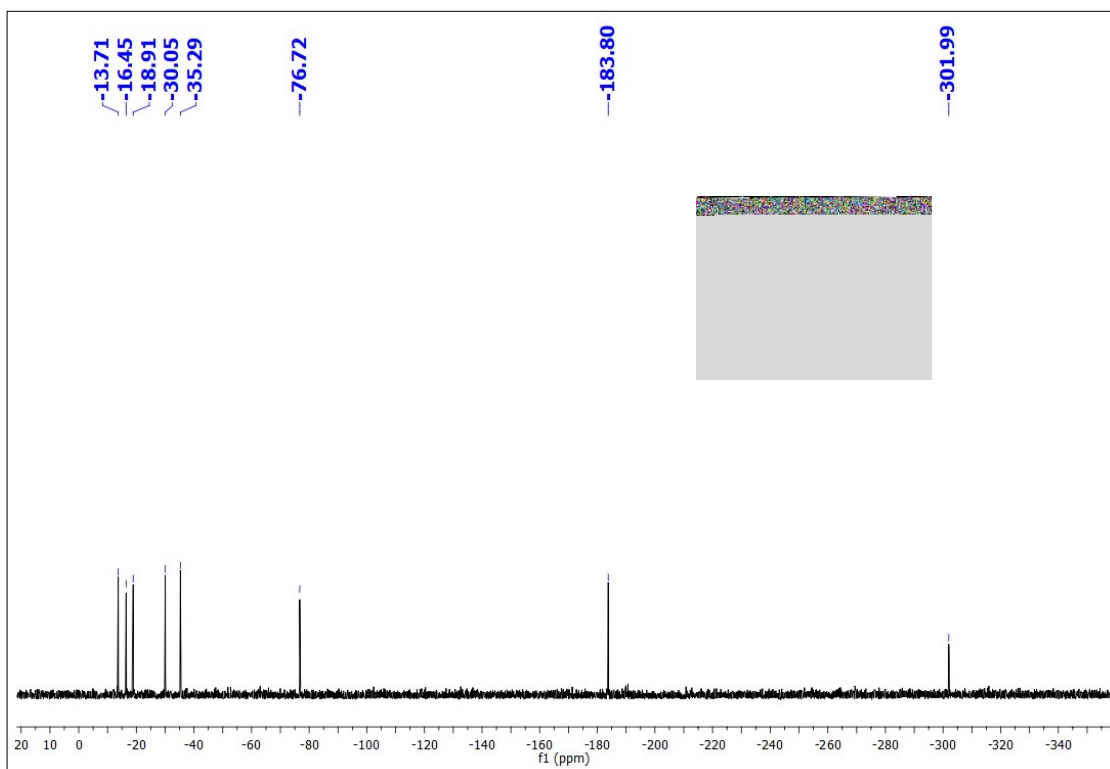

Fig.28:  $^{15}\text{N}$  NMR Spectra of compound **13**

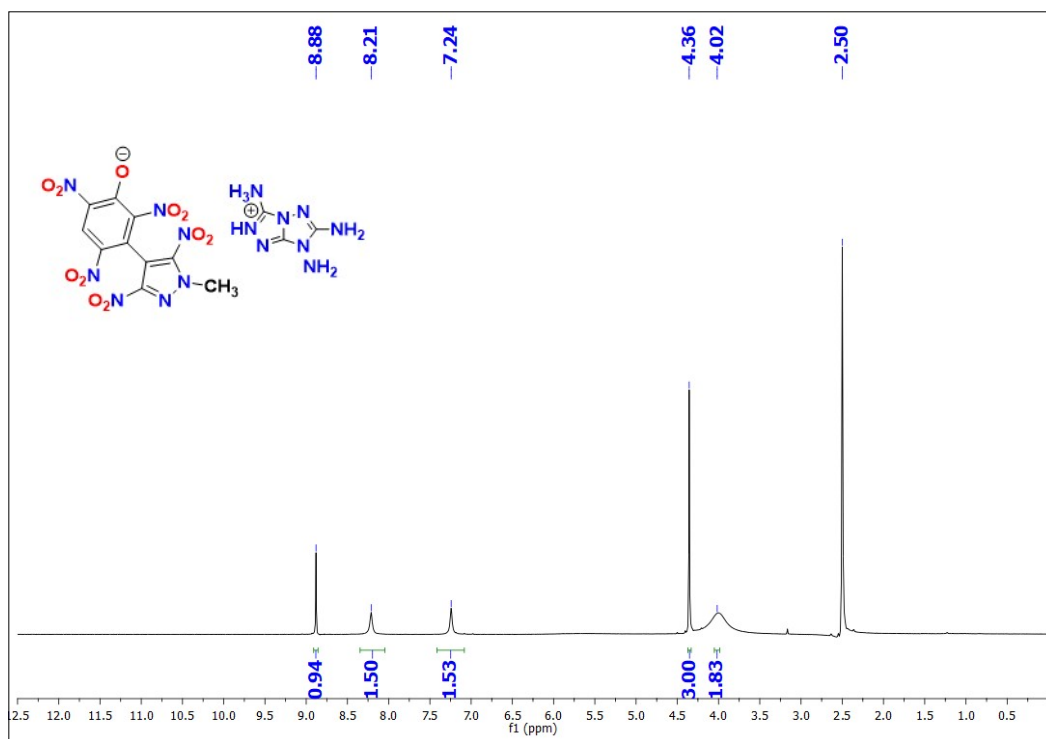

Fig.29:  $^1\text{H}$  NMR Spectra of compound 14

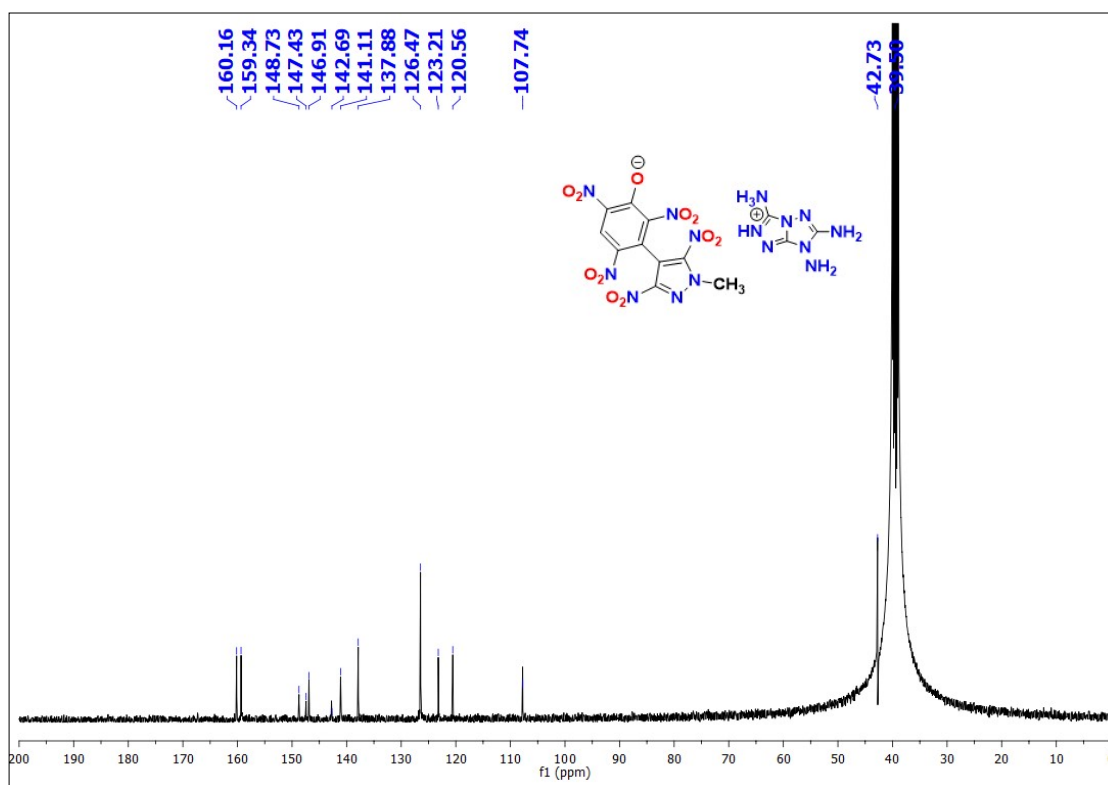

Fig.30:  $^{13}\text{C}\{^1\text{H}\}$  NMR Spectra of compound 14

## 4. Mass Spectra

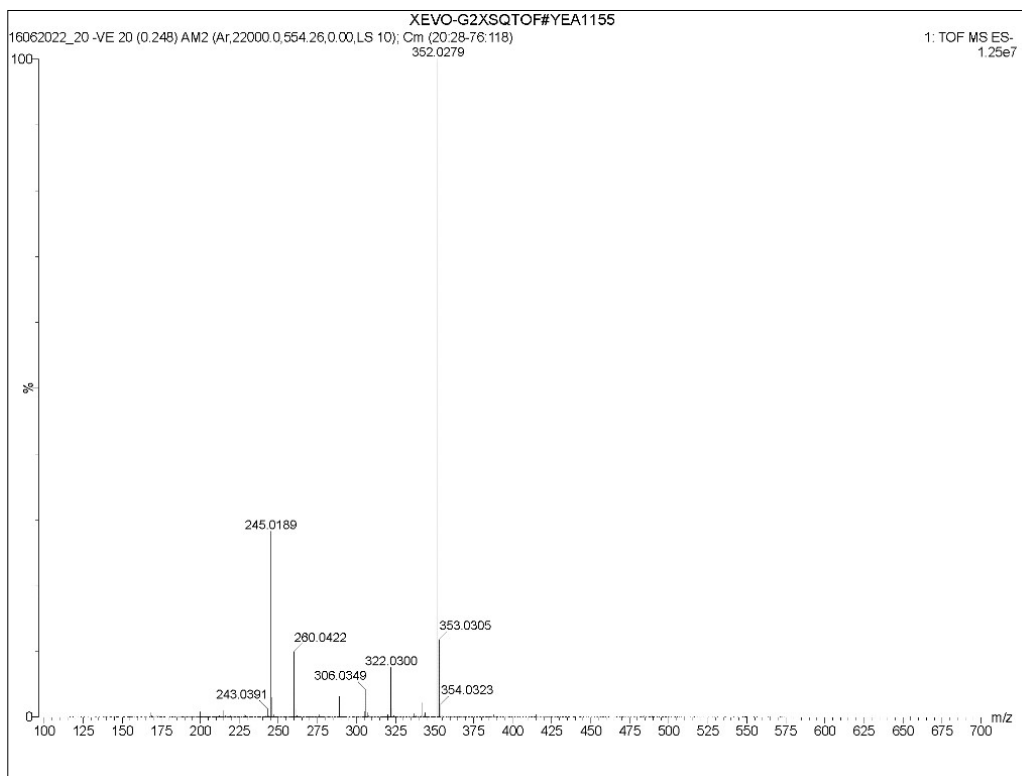

Fig.31: Mass Spectrum of Compound 5

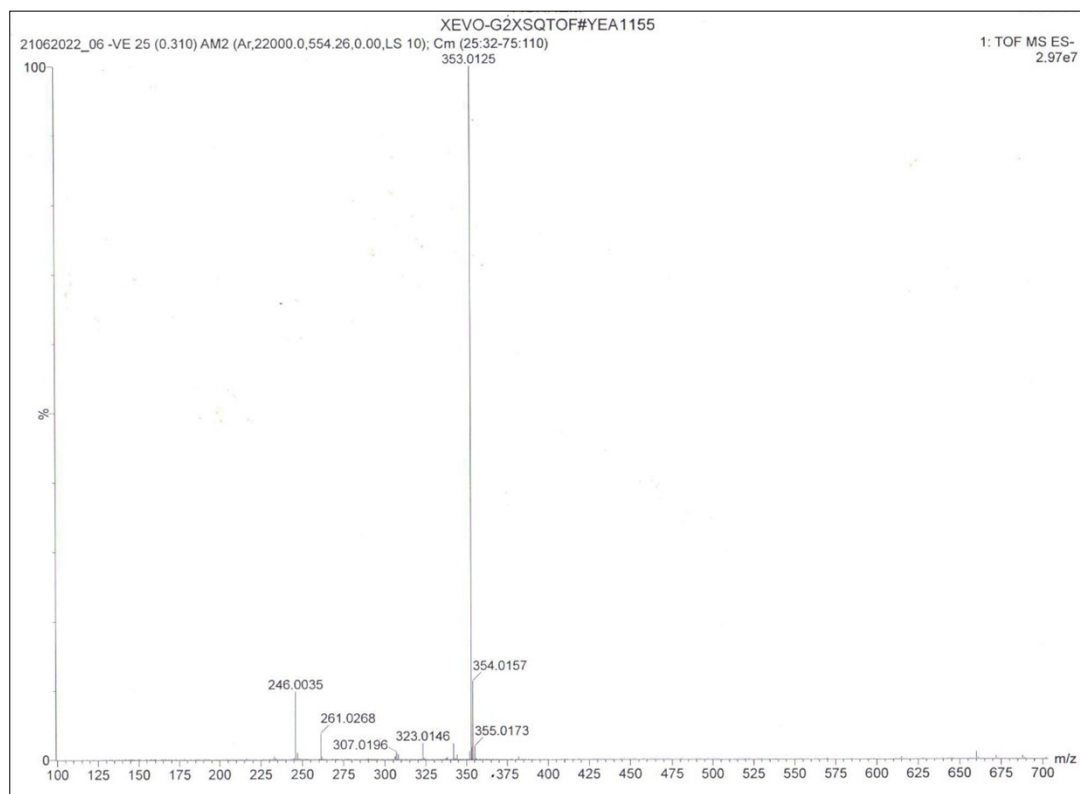

Fig.32: Mass Spectrum of Compound 6



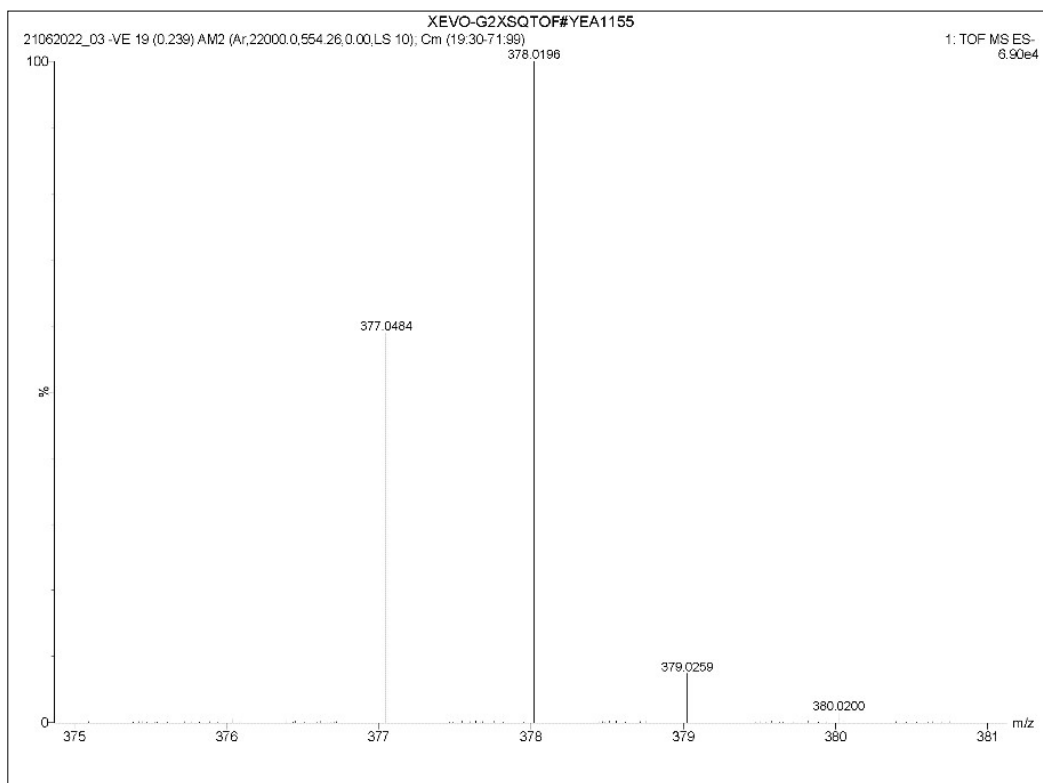

Fig.33: Mass Spectrum of Compound 7

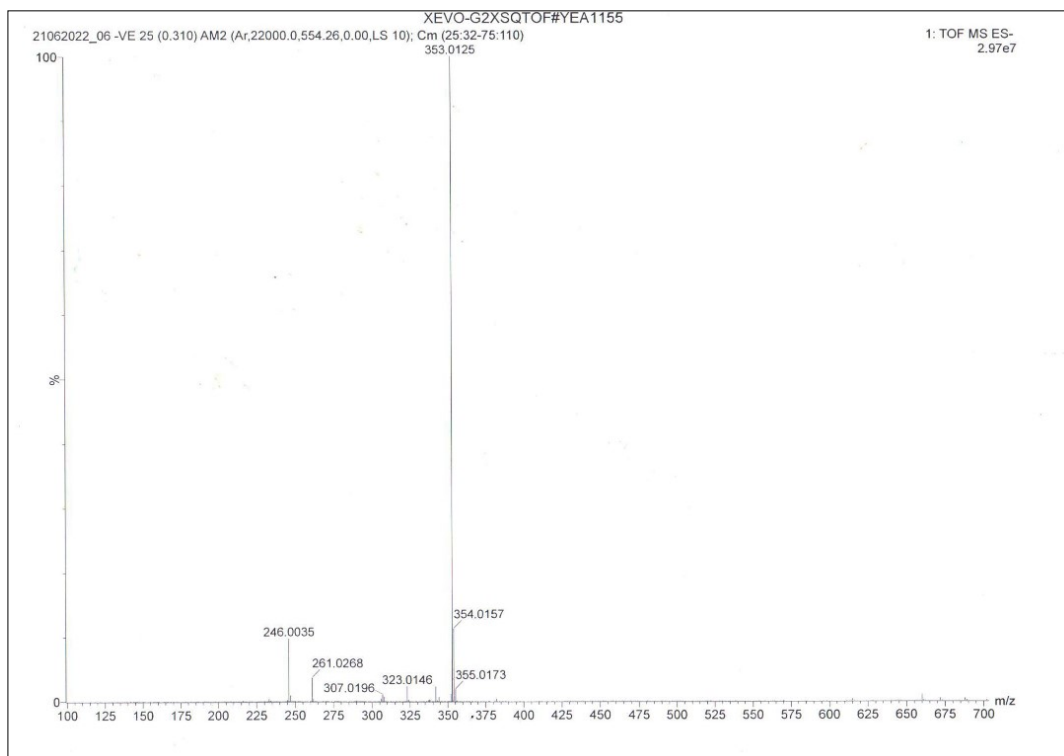

Fig.34: Mass Spectrum of Compound 8

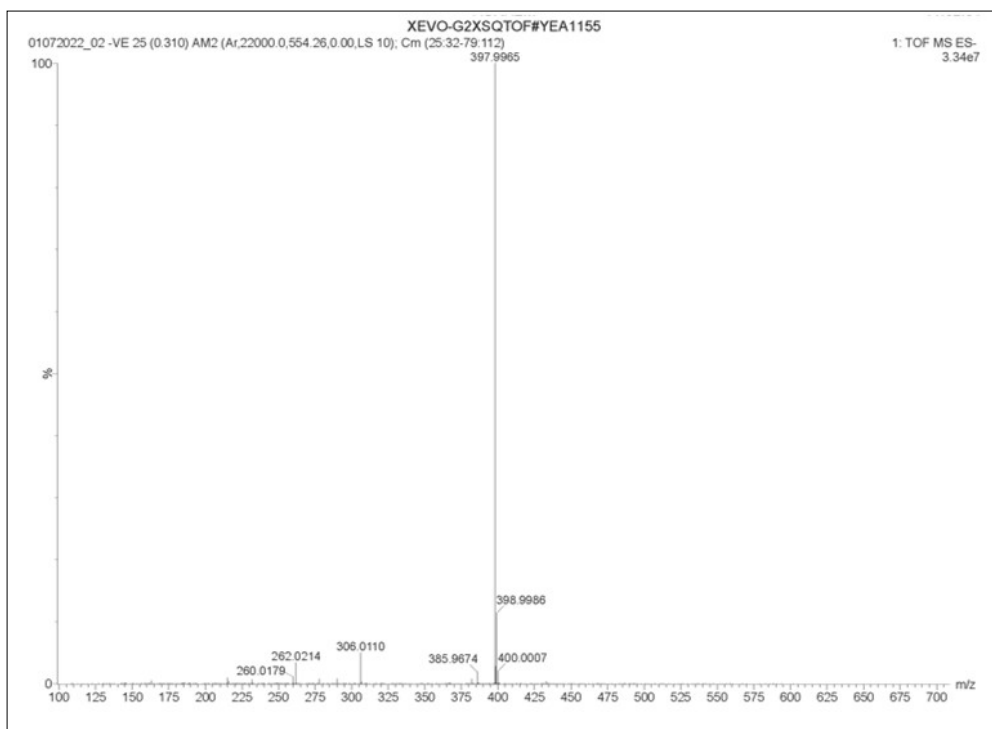

Fig.35: Mass Spectrum of Compound **10**

## 5. IR Data

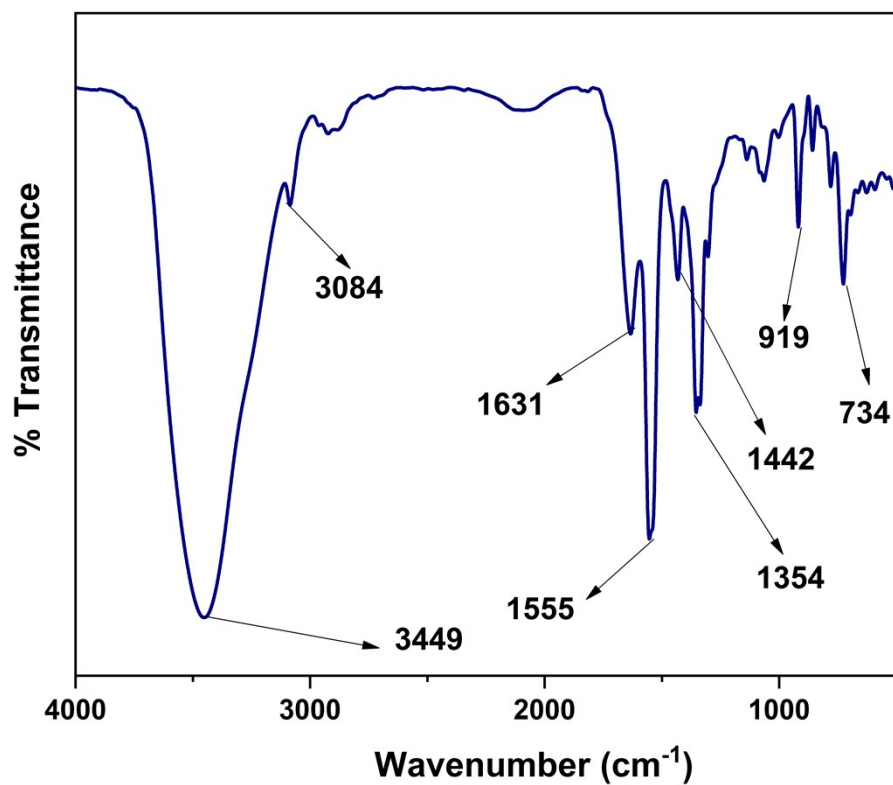

Fig.36: FTIR Spectra of compound 3

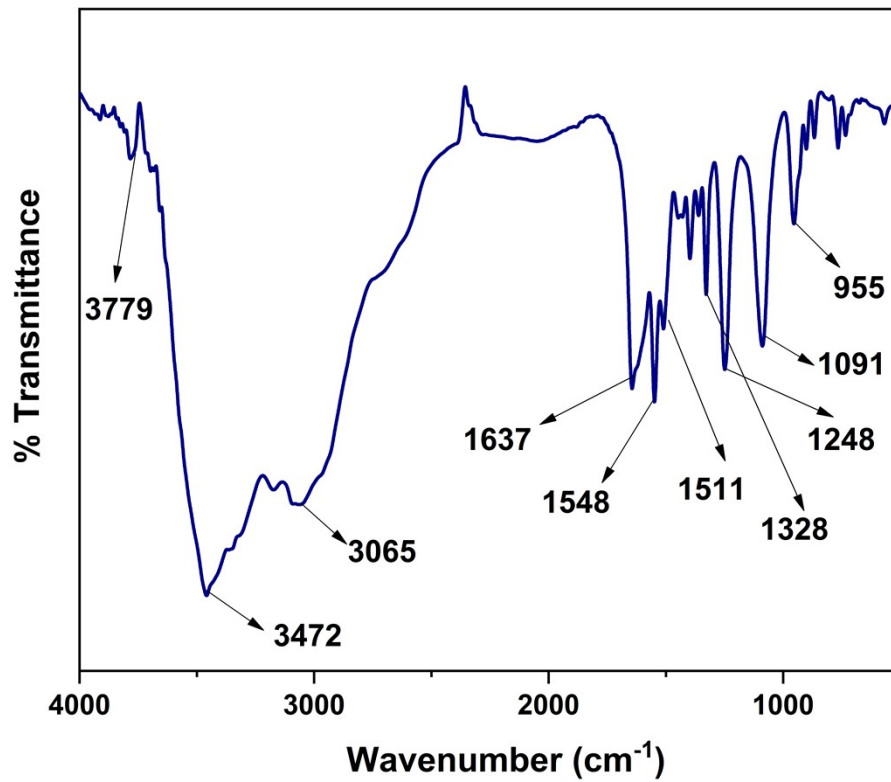

Fig.37: FTIR Spectra of compound 4

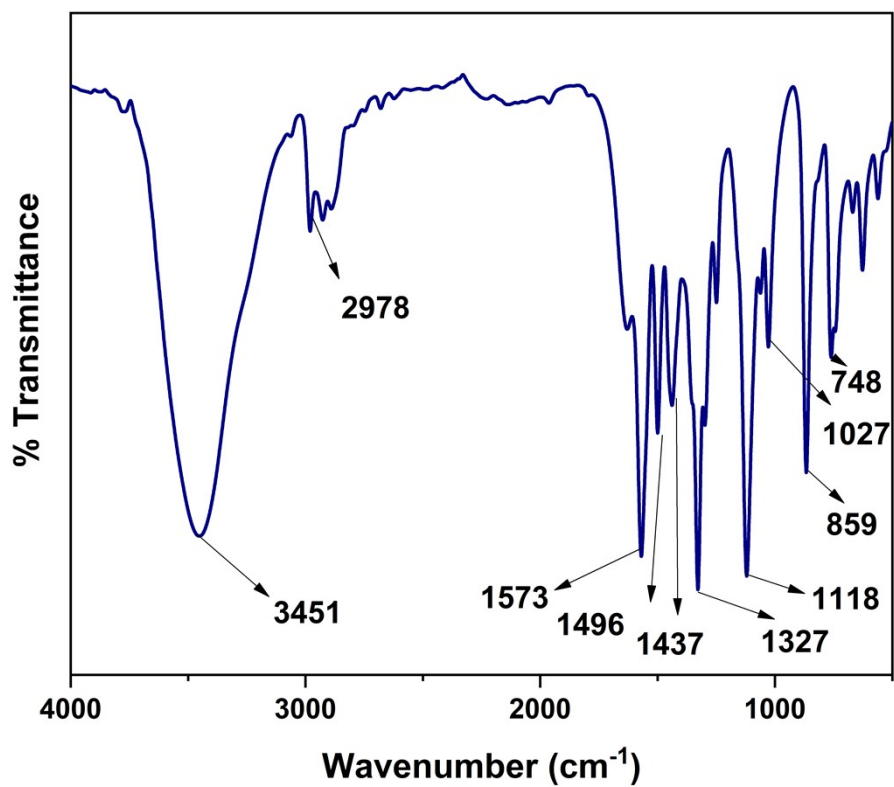

Fig.38: FTIR Spectra of compound 5

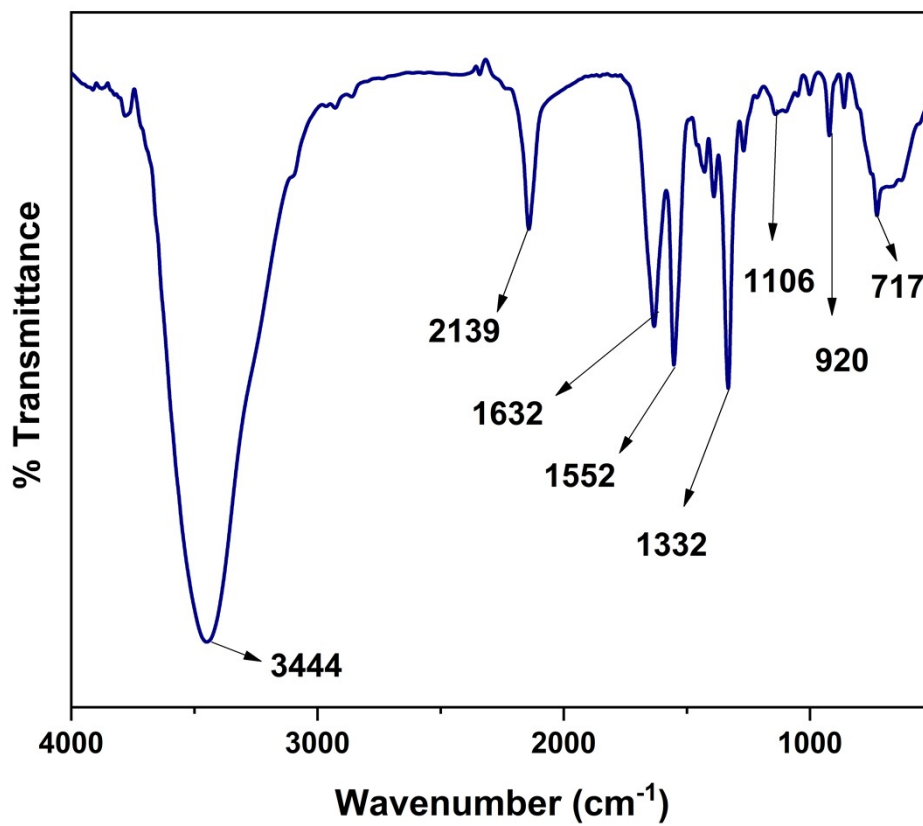

Fig.39: FTIR Spectra of compound 6

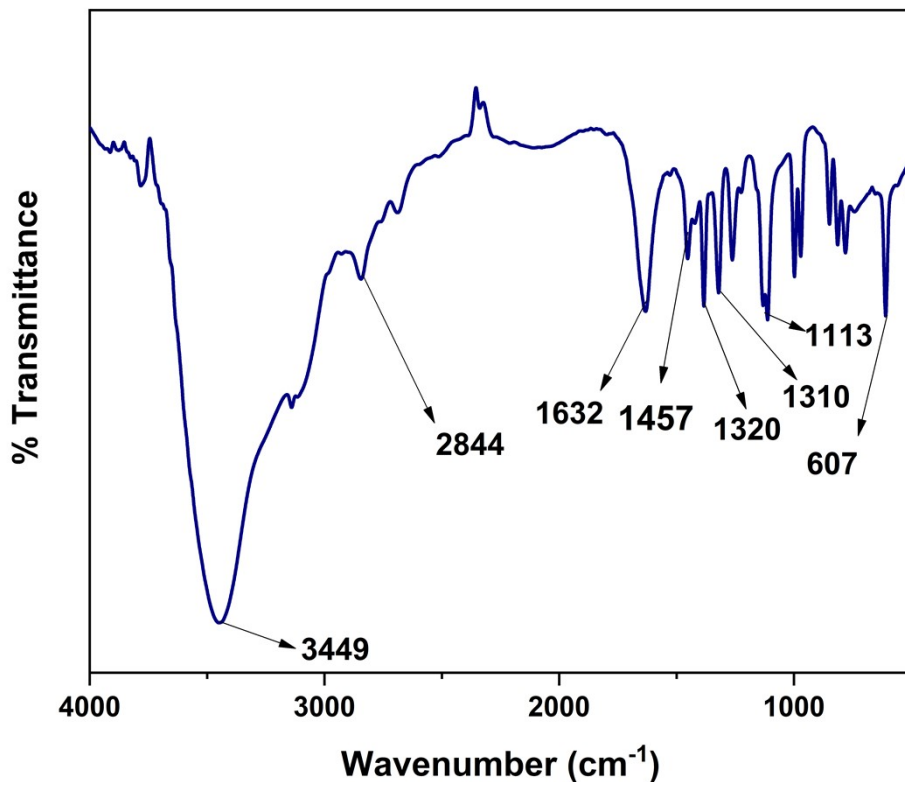

Fig.40: FTIR Spectra of compound 7

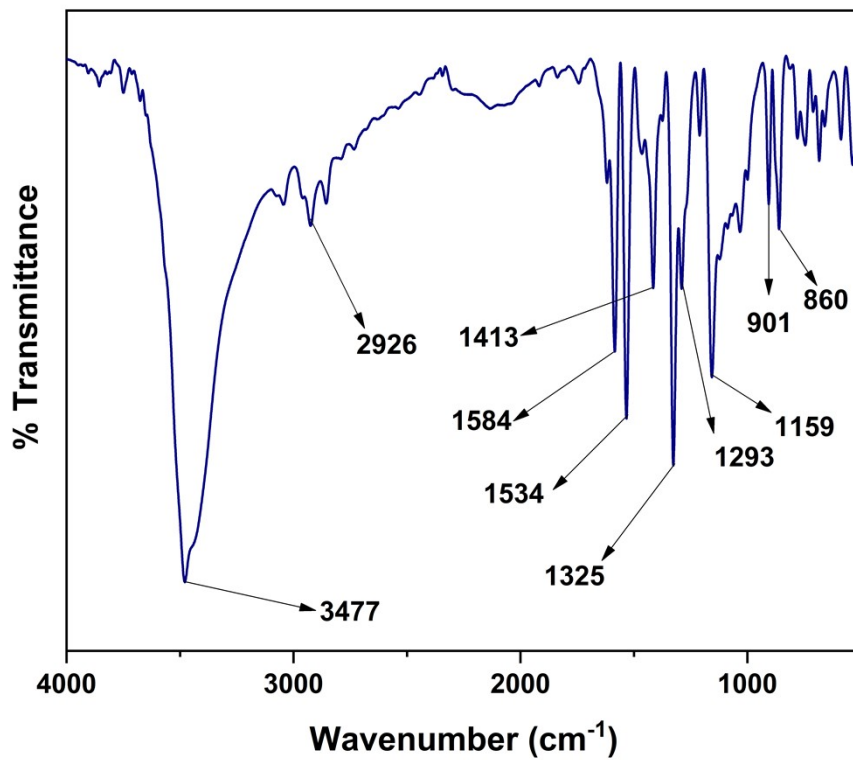

Fig.41: FTIR Spectra of compound 8

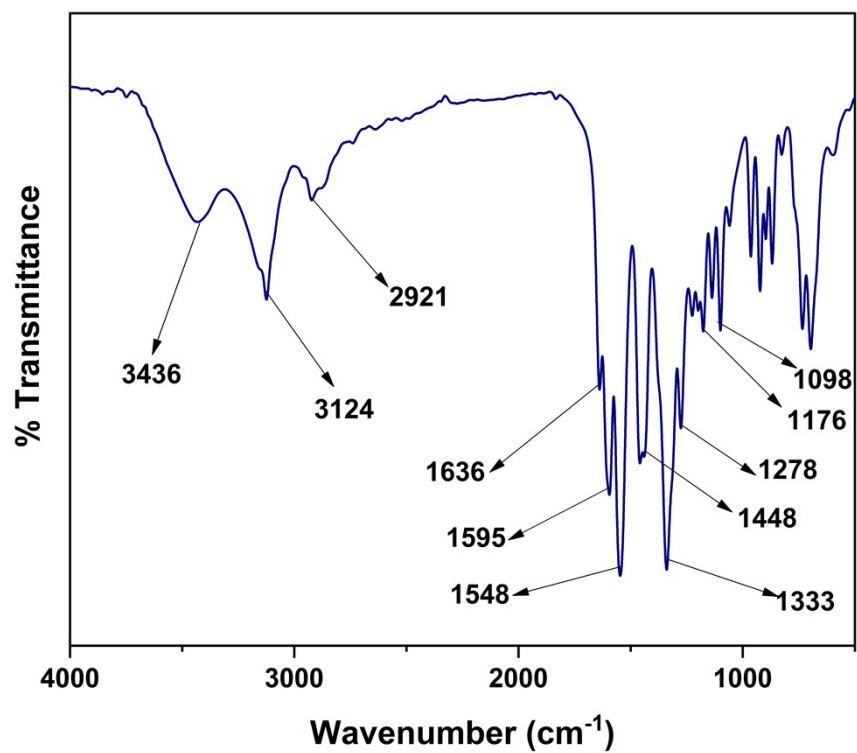

Fig.42: FTIR Spectra of compound 10

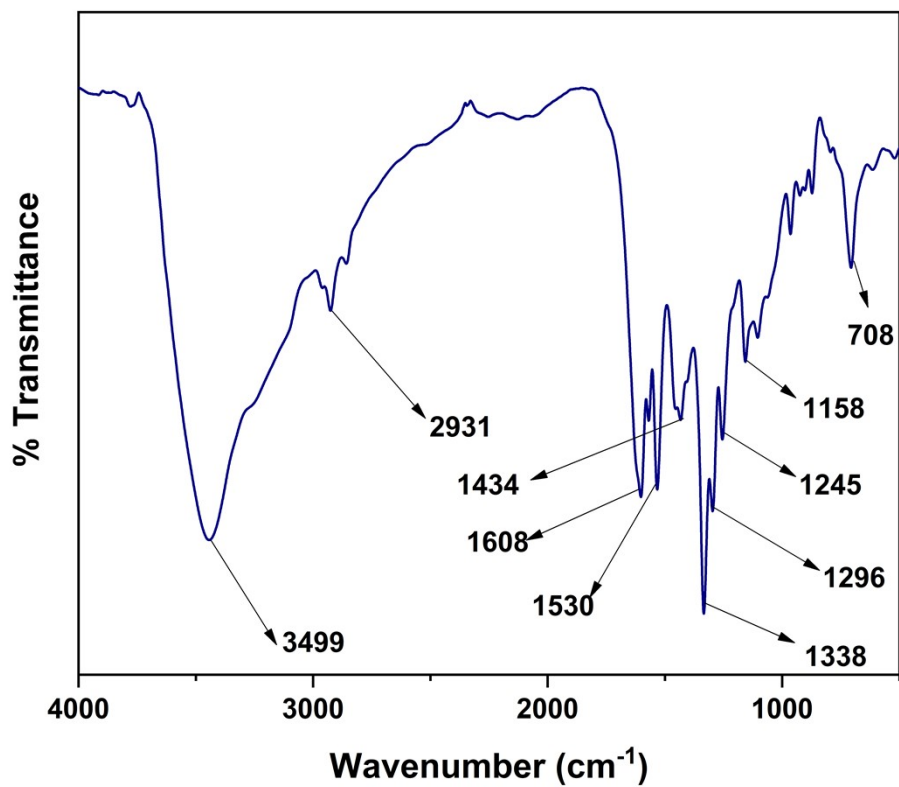

Fig.43: FTIR Spectra of compound 11

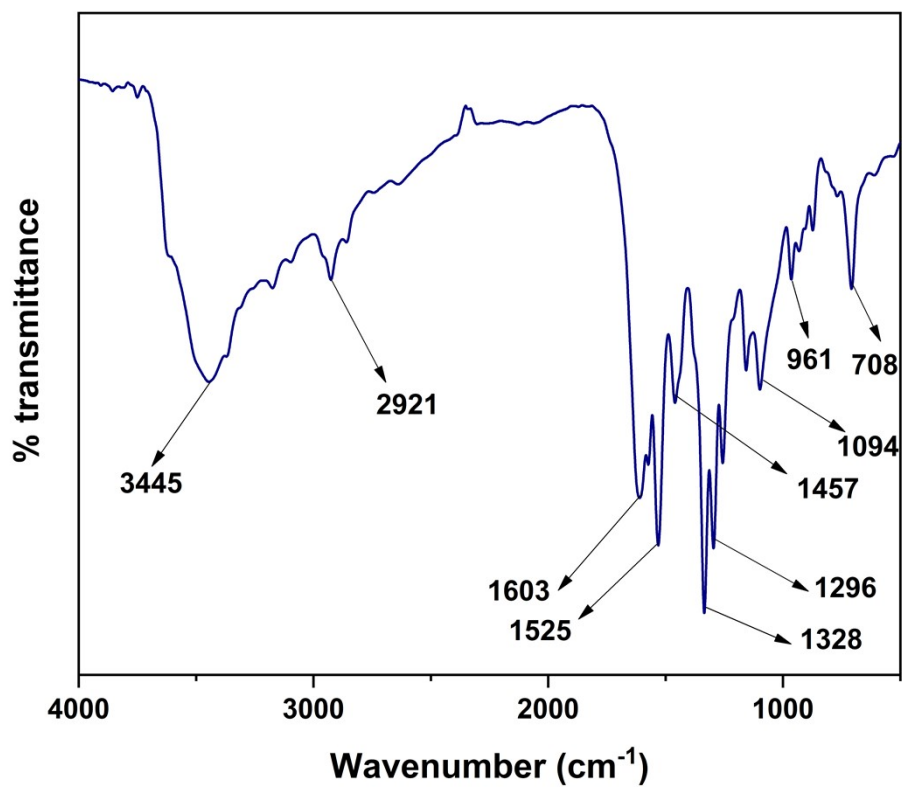

Fig.44: FTIR Spectra of compound 12

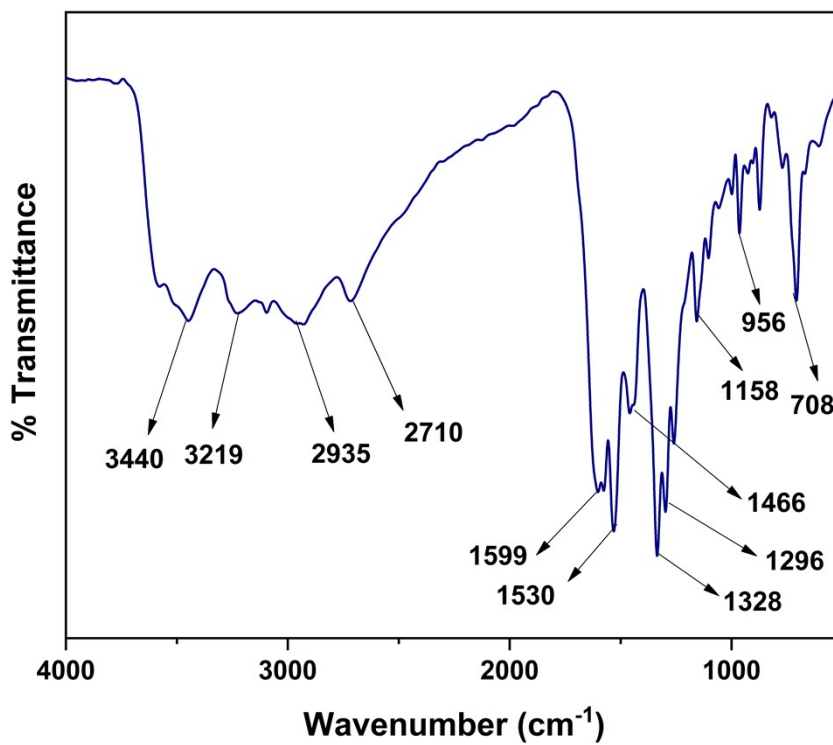

Fig.45: FTIR Spectra of compound 13

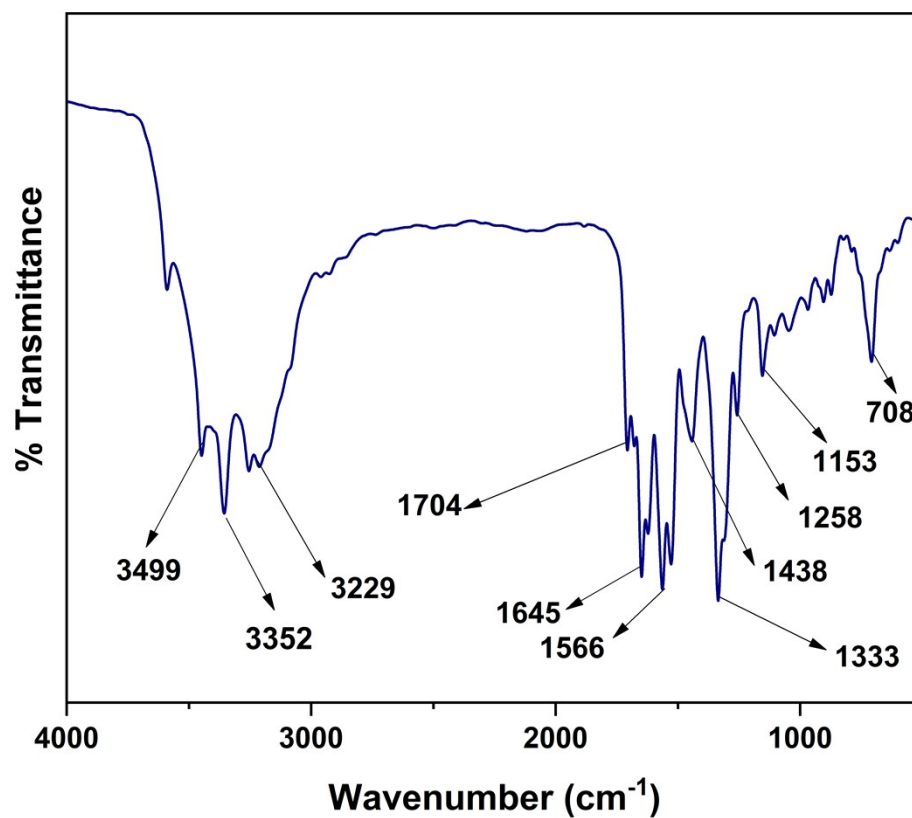

Fig.46: FTIR Spectra of compound **14**



## 6. DSC Analysis

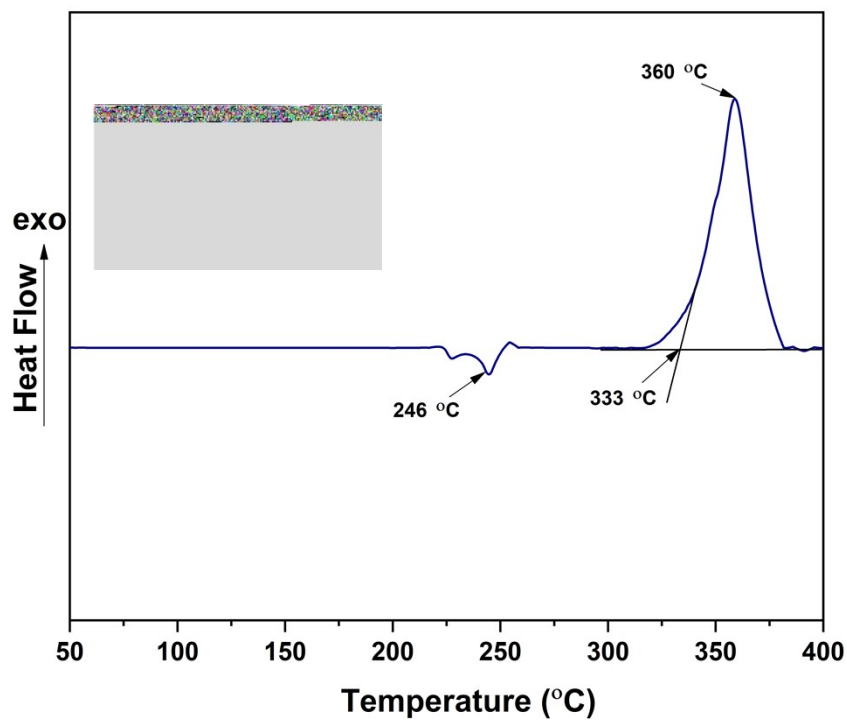

Fig.47: DSC curve of compound 5 at heating rate 5 °C/min.

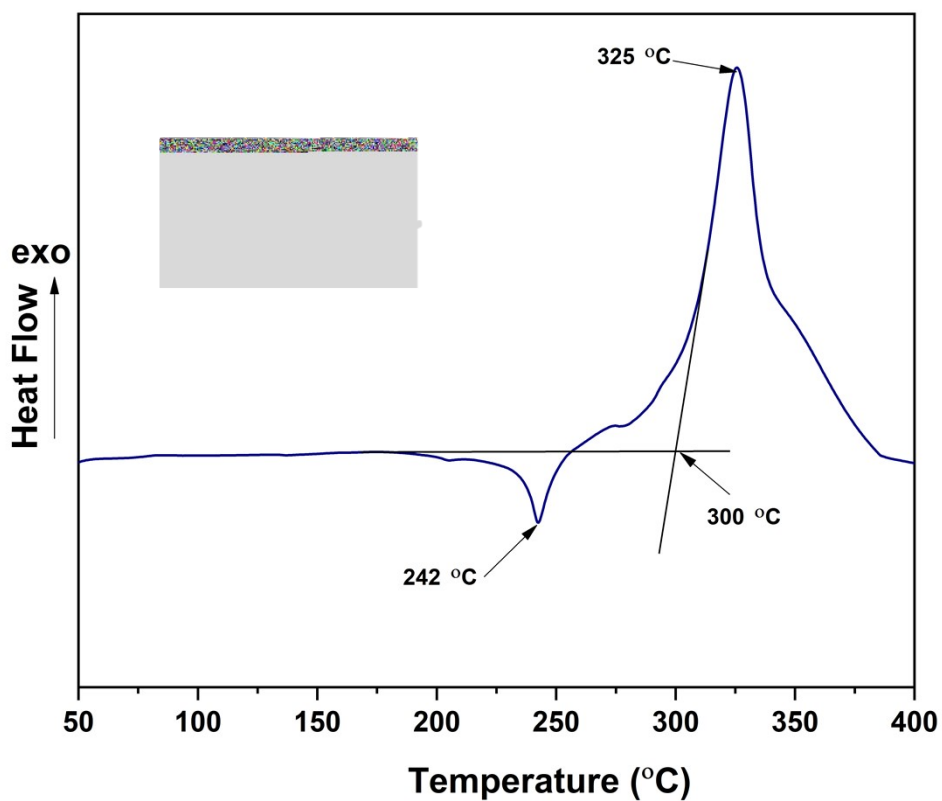

Fig.48: DSC curve of compound 6 at heating rate 5 °C/min.

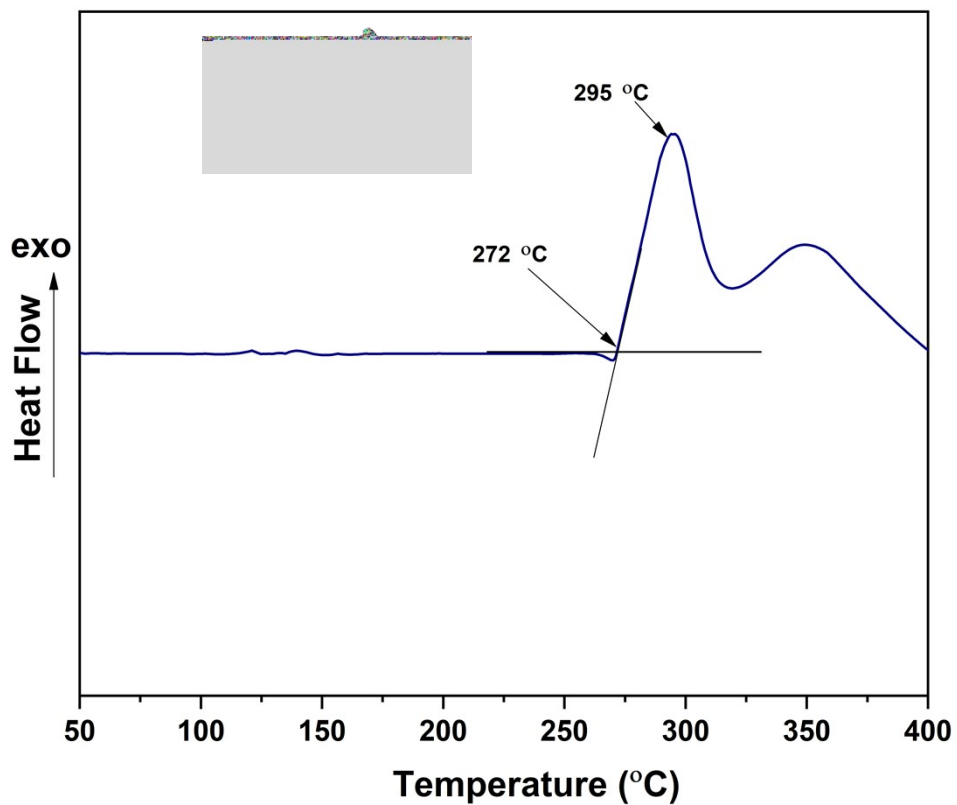

Fig.49: DSC curve of compound **7** at heating rate 5 °C/min.

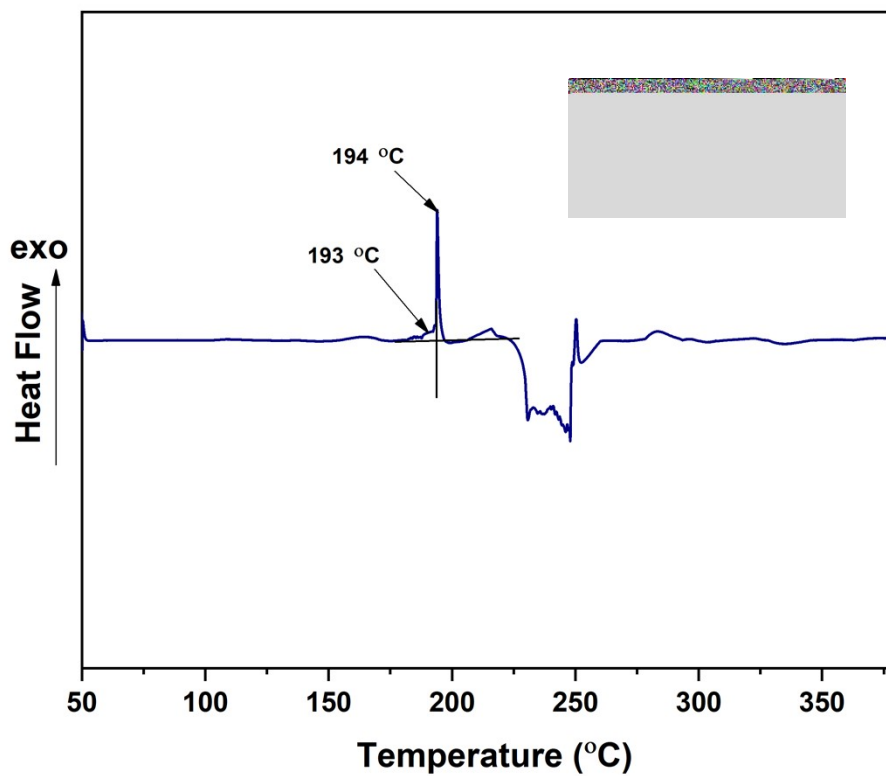

Fig.50: DSC curve of compound **8** at heating rate 5 °C/min.

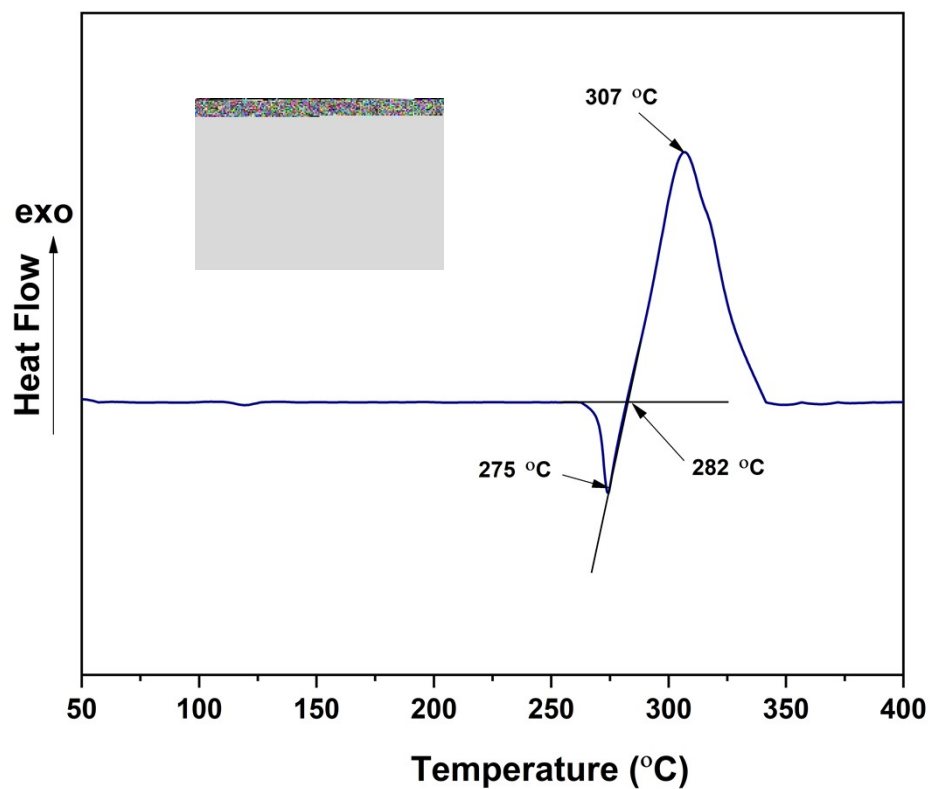

Fig.51: DSC curve of compound **10** at heating rate 5 °C/min.

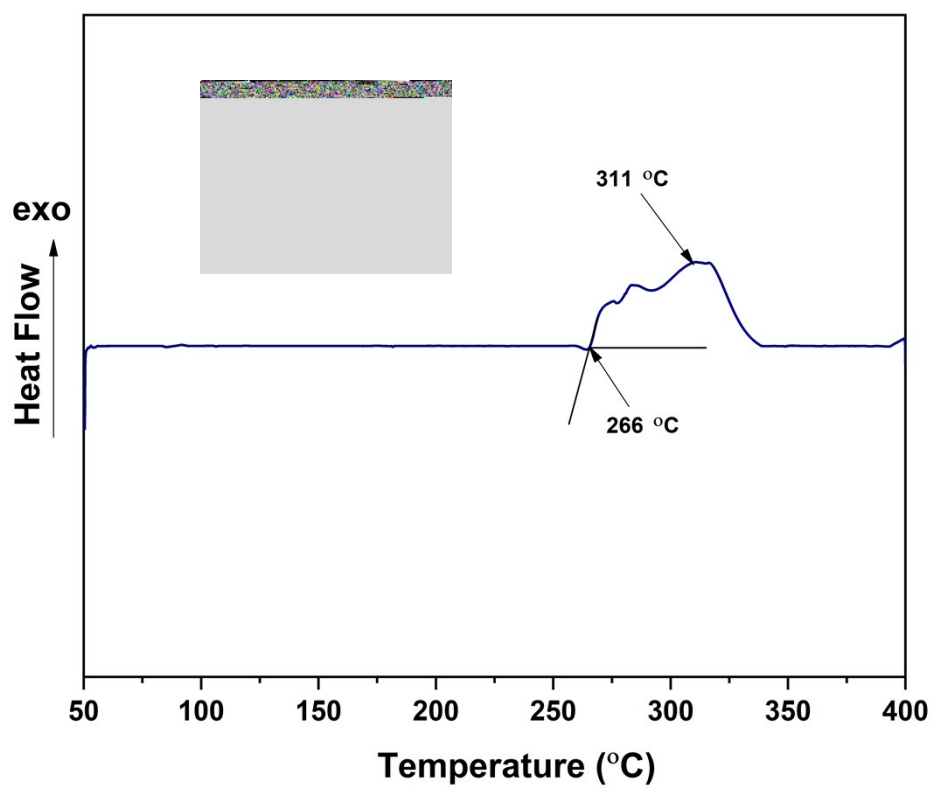

Fig.52: DSC curve of compound **11** at heating rate 5 °C/min.

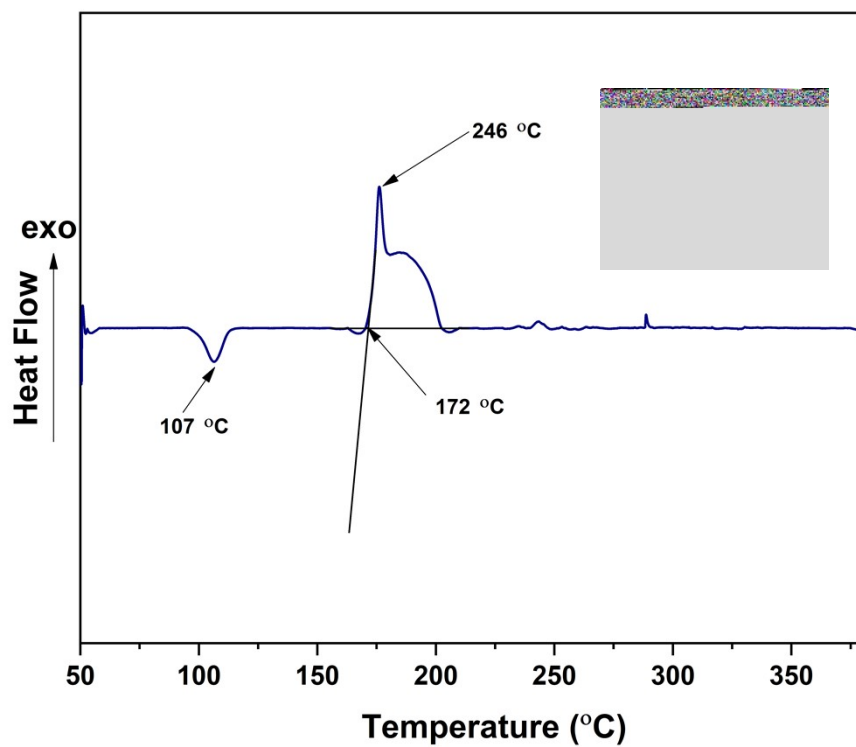

Fig.53: DSC curve of compound **12** at heating rate 5 °C/min.

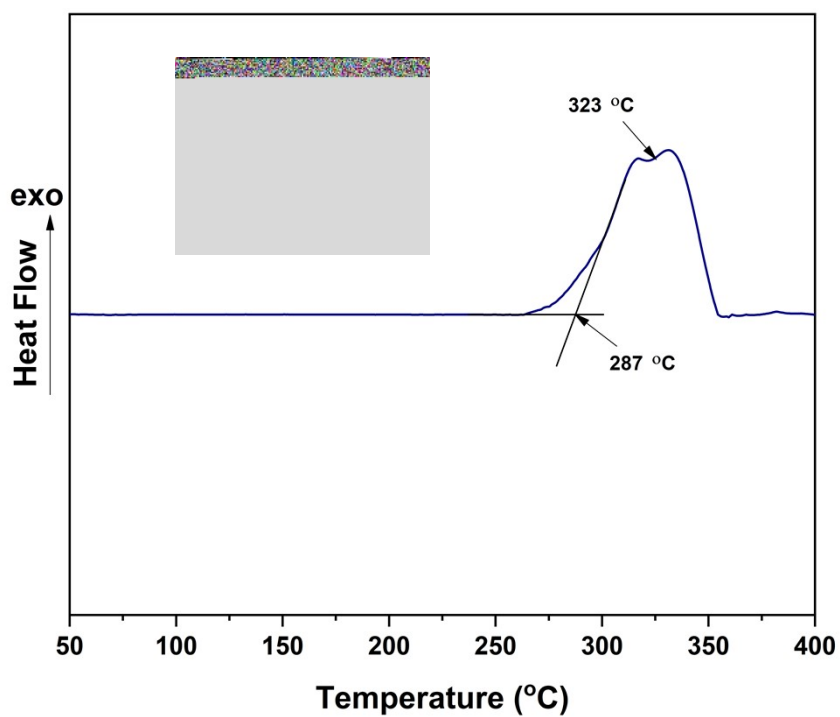

Fig.54: DSC curve of compound **13** at heating rate 5 °C/min.

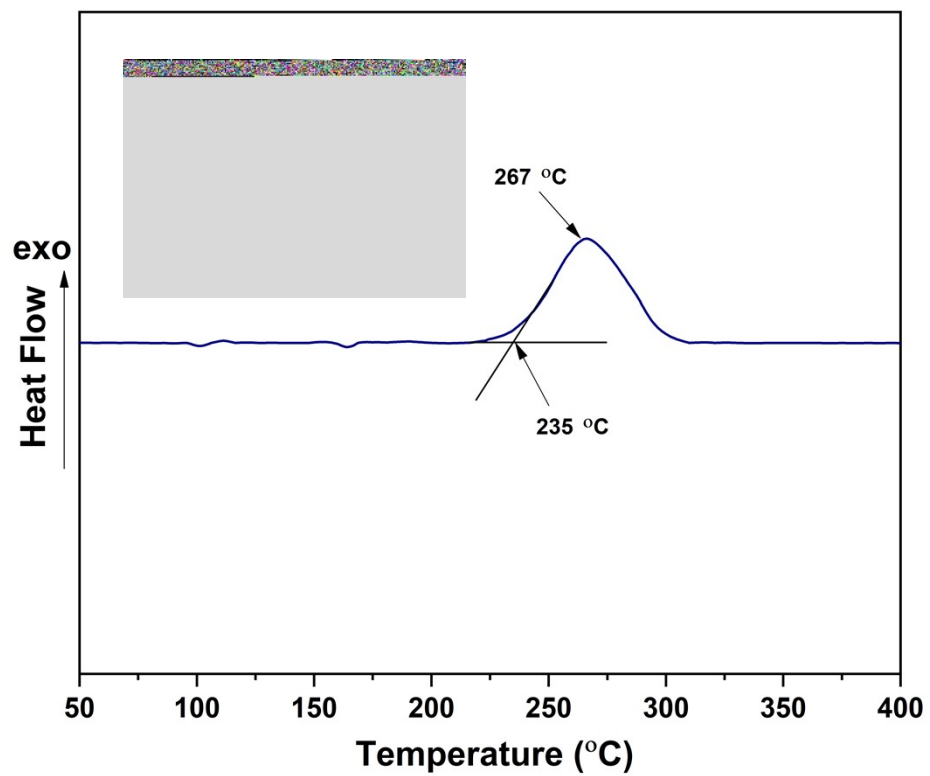

Fig.55: DSC curve of compound 14 at heating rate 5 °C/min.
